# Supplementary material for: Probing the role of synaptic adhesion molecule RTN4RL2 in setting up cochlear connectivity
Source: eLife. 2025 Oct 20;14:RP103481. doi: 10.7554/eLife.103481 (PMC12537009; doi:10.7554/eLife.103481)
Supplement: Figure 2—source data 1. [file elife-103481-fig2-data1.xlsx]

## Sheet: Figure 2C
#ribbons / IHC
WT	KO
9	13
12	13
10	11
9	15
11	15
12	12
13	9
11	12
8	12
8	15
11	11
9	12
8	11
9	11
9	11
	7
	8
	11
	10
	8

## Sheet: Figure 2D
WT			KO
Animal	ribbon volume		Animal	ribbon volume
NgR2_WT_177	0.061616		NgR2_KO_159	0.18677
	0.0699901			0.200008
	0.0955668			0.157312
	0.0320422			0.215424
	0.0717585			0.168668
	0.0623418			0.194467
	0.101823			0.118108
	0.0933892			0.375898
	0.0942078			0.112076
	0.0780744			0.137265
	0.0797747			0.316473
	0.0726224			0.196392
	0.21366			0.145669
	0.037452			0.294404
	0.0485524			0.528576
	0.0897225			0.293488
	0.0947818			0.270504
	0.0737377			0.236886
	0.0321641			0.338486
	0.0691213			0.392935
	0.0654314			0.217189
	0.163165			0.15601
	0.0906236			0.18092
	0.104406			0.344318
	0.0425676			0.182669
	0.0819177			0.2361
	0.0485001			0.162834
	0.0660118			0.246011
	0.145703			0.198282
	0.0643856			0.184537
	0.100147			0.223749
	0.0889367			0.12766
	0.115948			0.074843
	0.0908958			0.211569
	0.287332			0.275146
	0.0530505			0.204964
	0.0152984			0.168239
	0.0693107			0.199739
	0.0976821			0.249866
	0.178893			0.1804
	0.136834			0.13689
	0.155801			0.173716
	0.298028			0.165354
	0.0915865			0.234261
	0.149537			0.154141
	0.312858			0.179738
	0.110414			0.23491
	0.127898			0.213777
	0.0911286			0.207436
	0.0631889			0.0816768
	0.155193			0.220472
	0.111665			0.176833
	0.0481981			0.271846
	0.307394			0.223608
	0.0983641			0.260098
	0.140382			0.33529
	0.0974303			0.211987
	0.127494			0.322921
	0.12253			0.195939
	0.107485			0.329406
	0.141593			0.147883
	0.0843393			0.201685
	0.0613058			0.19756
	0.125313			0.261726
	0.110072			0.273534
	0.168217			0.22342
	0.0987548			0.0924208
	0.135069			0.180883
	0.0640299			0.213969
	0.242214			0.21712
	0.143012			0.20943
	0.0718533			0.171906
	0.111898			0.171111
	0.122021			0.227652
	0.0797788			0.353604
	0.0736451			0.172526
	0.136218			0.339363
	0.0933453			0.156949
	0.108686			0.197361
	0.297243			0.155108
	0.208313			0.2565
	0.21143			0.161447
	0.129357			0.385668
	0.107942			0.227793
	0.157958			0.277619
	0.12234			0.214349
	0.144501			0.154293
	0.0613048			0.195061
	0.0958794			0.425262
	0.144156			0.215163
	0.0551061			0.21478
	0.101316			0.239319
NgR2_WT_178	0.126269			0.175256
	0.335104			0.532698
	0.217449			0.254762
	0.17153			0.319205
	0.210551			0.10067
	0.219326			0.187039
	0.166337			0.326826
	0.129559		NgR2_KO_160	0.246647
	0.140412			0.282178
	0.224683			0.431335
	0.260818			0.213523
	0.283343			0.176896
	0.3016			0.348289
	0.289166			0.214942
	0.157725			0.244316
	0.200476			0.14096
	0.267339			0.256486
	0.146065			0.153932
	0.171291			0.172077
	0.281078			0.45877
	0.324999			0.274094
	0.216877			0.185166
	0.165337			0.302496
	0.260277			0.254686
	0.29589			0.346998
	0.131469			0.249903
	0.258554			0.207019
	0.206835			0.297726
	0.35895			0.408488
	0.55289			0.221454
	0.260457			0.170437
	0.229165			0.212718
	0.209384			0.156328
	0.419063			0.288733
	0.225255			0.243772
	0.106463			0.216415
	0.17523			0.194416
	0.213823			0.206457
	0.348258			0.205532
	0.122984			0.232635
	0.295307			0.186278
	0.151555			0.159156
	0.123286			0.200477
	0.137242			0.223409
	0.150369			0.299858
	0.169705			0.414441
	0.12761			0.259622
	0.174379			0.18885
	0.148444			0.150297
	0.154216			0.241003
	0.238109			0.193357
	0.175236			0.254145
	0.219632			0.293547
	0.212351			0.193583
	0.161949			0.236222
	0.241932			0.325933
	0.223847			0.204154
	0.223711			0.191912
	0.232922			0.231209
	0.163155			0.236738
	0.13531			0.164181
	0.0849679			0.31221
	0.176494			0.234939
	0.242722			0.201027
	0.0920667			0.140346
	0.15441			0.329727
	0.184101			0.182912
	0.15522			0.248524
	0.0991472			0.196548
	0.155526			0.456133
	0.362582			0.183099
	0.151344			0.1987
	0.177722			0.218169
				0.313501
				0.23392
				0.487099
				0.255924
				0.316708
				0.190568
				0.226025
				0.206649
				0.209211
				0.164158
				0.199628
				0.305355
				0.250902
				0.254834
				0.360986
				0.213223
				0.272828
				0.269964
				0.191106
				0.257757
				0.306577
				0.281626
			NgR2_KO_163	0.133391
				0.153592
				0.151433
				0.180428
				0.240792
				0.166293
				0.0571175
				0.0959954
				0.285836
				0.185892
				0.183935
				0.0790131
				0.180668
				0.0456001
				0.10878
				0.202798
				0.137849
				0.158603
				0.103958
				0.0698269
				0.211506
				0.13608
				0.160316
				0.107445
				0.14716
				0.16264
				0.0927616
				0.0820971
				0.181723
				0.154269
				0.268881
				0.156733
				0.150192
				0.284462
				0.0787331
				0.157858
				0.106163
				0.124433
				0.304678
				0.112981
				0.17026
				0.179337
				0.134471
				0.0772651
				0.336236
				0.139213
				0.110493
				0.159139
				0.130243
				0.0575956
				0.162188
				0.29994
				0.0923918
				0.561279
				0.106908
				0.113247
				0.060052
				0.139541
				0.108042
				0.133631
				0.107126
				0.204036
				0.132572
				0.0528843
				0.0804614
				0.0813514
				0.139912
				0.0814072
				0.094807
				0.089074
				0.0687884
				0.150732

## Sheet: Figure 2E
WT			KO
Animal	Homer1 volume ribbon juxtaposing		Animal	Homer1 volume ribbon juxtaposing
NgR2_WT_177	0.33592		NgR2_KO_159	0.236431
	0.179596			0.225483
	0.175503			0.475504
	0.570529			0.176081
	0.251215			0.380158
	0.240197			0.424114
	0.351419			0.157307
	0.27611			0.295954
	0.228124			0.351351
	0.108838			0.300018
	0.26584			0.0398767
	0.28208			0.11723
	0.410319			0.365792
	0.361921			0.191006
	0.189412			0.103354
	0.220051			0.103492
	0.181474			0.311076
	0.572771			0.336975
	0.342788			0.208306
	0.300167			0.354617
	0.336238			0.280916
	0.211262			0.205708
	0.164288			0.370165
	0.182938			0.0649274
	0.227138			0.0967362
	0.384728			0.262913
	0.154071			0.34529
	0.177422			0.156526
	0.201958			0.190498
	0.368843			0.11241
	0.373252			0.174893
	0.340781			0.0722331
	0.290235			0.259093
	0.397558			0.227102
	0.151077			0.261534
	0.294481			0.115237
	0.392869			0.225407
	0.258118			0.295626
	0.368188			0.289622
	0.232727			0.314495
	0.356813			0.258687
	0.489777			0.429023
	0.280187			0.174113
	0.329856			0.224407
	0.380646			0.243207
	0.301184			0.906718
	0.299383			0.15117
	0.259714			0.412265
	0.180446			0.20108
	0.10225			0.123783
	0.429279			0.346043
	0.0532422			0.272969
	0.203402			0.207889
	0.42485			0.356238
	0.50394			0.200218
	0.132145			0.253928
	0.394775			0.0614082
	0.289629			0.275801
	0.353135			0.43377
	0.411327			0.0648005
	0.553802			0.161975
	0.233189			0.150531
	0.257131			0.193177
	0.388955			0.0663101
	0.353467			0.33276
	0.302303			0.72576
	0.309933			0.399547
	0.373569			0.218648
	0.240917			0.585993
	0.627447			0.689702
	0.281817			0.373393
	0.526729			0.177613
	0.208788			0.211056
	0.485839			0.368217
	0.363901			0.377904
	0.348815			0.0344284
	0.308277			0.249858
	0.201556			0.345302
	0.433615			0.2412
	0.185227			0.187169
	0.338099			0.0521202
	0.371628			0.171766
	0.149779			0.464515
	0.4306			0.263412
	0.136382			0.14172
	0.223853			0.249519
	0.379569			0.247879
	0.216982			0.0744903
	0.373083			0.26356
	0.436459			0.14436
	0.195506			0.295043
NgR2_WT_178	0.138357			0.387909
	0.349632			0.353831
	0.14167			0.115526
	0.505263			0.331058
	0.498636			0.865709
	0.411843			0.71871
	0.344771			0.358083
	0.30443			0.202363
	0.247202			1.11698
	0.430199		NgR2_KO_160	0.206371
	0.609239			0.539049
	0.34421			0.165642
	0.396817			0.298617
	0.338674			0.332395
	0.497493			0.209902
	0.405964			0.319047
	0.423122			0.446261
	0.595998			0.36186
	0.714749			0.426901
	0.447022			0.137177
	0.288903			0.125845
	0.487373			0.240602
	0.261968			0.0644267
	0.27807			0.233803
	0.103447			0.371483
	0.335425			0.259891
	0.299484			0.452732
	0.523079			0.489608
	0.483253			0.247446
	0.892678			0.189979
	0.329445			0.447084
	0.541325			0.44037
	0.545509			0.306498
	0.383991			0.11946
	0.183452			0.308851
	0.668499			0.163563
	0.327741			0.199498
	0.294537			0.207636
	0.33735			0.572567
	0.44473			0.504287
	0.537633			0.317746
	0.519046			0.311156
	0.297481			0.327113
	0.438127			0.214027
	0.405676			0.560519
	0.36693			0.234115
	0.447086			0.117594
	0.36541			0.173139
	0.38344			0.282523
	0.611527			0.320974
	0.617763			0.264069
	0.662096			0.297509
	1.04912			0.454647
	0.515619			0.26161
	0.678179			0.124476
	0.343062			0.0712372
	0.501274			0.297443
	0.475869			0.198638
	0.495618			0.435073
	0.421811			0.132568
	0.175474			0.0563039
	0.511643			0.116489
	0.17488			0.0859235
	0.549584			0.140912
	0.0913527			0.136296
	0.0361319			0.167179
	0.406327			0.270834
	0.669674			0.152883
	0.42177			0.379498
				0.31628
				0.0579344
				0.52567
				0.303221
				0.0486653
				0.427576
				0.124047
				0.121937
				0.300164
				0.374303
				0.178724
				0.291904
				0.944348
				0.159481
				0.138369
				0.303644
				0.50891
				0.551001
				0.320232
			Ngr2_KO_163	0.105645
				0.167398
				0.0037078
				0.0137835
				0.0406215
				0.180394
				0.261939
				0.0199789
				0.0465805
				0.0567401
				0.127346
				0.283798
				0.176298
				0.223664
				0.205542
				0.0642263
				0.0533224
				0.0482561
				0.104088
				0.103212
				0.043558
				0.0214
				0.112098
				0.356527
				0.0891169
				0.101089
				0.100577
				0.358572
				0.183321
				0.0746782
				0.196807
				0.194993
				0.58988
				0.279761
				0.0331866
				0.151934
				0.116906
				0.236697
				0.0807594
				0.203639
				0.304292
				0.00369799
				0.511045
				0.0860244
				0.0641129
				0.16417
				0.134011
				0.175037
				0.145764
				0.334993
				0.0103785
				0.0801826
				0.0685722
				0.273798
				0.382215
				0.772994
				0.139399
				0.331524
				0.352147
				0.118765
				0.256033
				0.165258
				0.235473
				0.316119
				0.18062
				0.061103
				0.325164
				0.735132
				0.385577
				1.59195

## Sheet: Figure 2F
Ribbons Juxtaposing Homer1 % / IHC
WT	KO
100	75
100	100
100	87.5
88.8889	100
90	100
100	100
100	81.8182
100	90.9091
100	83.3333
87.5	90.9091
100	80
100	100
87.5	75
100	100
	90.9091
	100
	88.8889
	85.7143
	81.8182
	77.7778
