# Supplementary material for: Probing the role of synaptic adhesion molecule RTN4RL2 in setting up cochlear connectivity
Source: eLife. 2025 Oct 20;14:RP103481. doi: 10.7554/eLife.103481 (PMC12537009; doi:10.7554/eLife.103481)
Supplement: Figure 3—figure supplement 1—source data 1. [file elife-103481-fig3-figsupp1-data1.xlsx]

## Sheet: Figure 3-figure supplement 1 D
GluA2				GluA4
WT_around_ribbons	KO_around_ribbons	KO_random		WT_around_ribbons	KO_around_ribbons	KO_random
6108	5007	5028		64878	25723	38830
6616	5043	6199		60674	33308	29089
7618	4642	4504		53574	25643	33270
5713	4433	3507		45782	36507	32980
5782	5308	1791		55716	44178	25425
4028	4793	5598		50932	31394	29567
5456	4647	4180		43334	23660	45334
7751	6898	5857		34034	40322	41918
4292	6202	5430		38964	43030	24279
9270	3625	5783		54111	24211	33678
7631	3282	5704		48776	19826	25210
7187	3143	5527		55137	33898	35071
2670	3330	4754		26436	26916	43300
7492	4104	6209		59195	40912	39801
3214	2640	7302		32826	24049	39985
5650	5275	6981		39233	33514	43799
7702	4259	5114		57073	39606	46712
8975	5269	5146		62199	34518	35800
6156	4023	5002		64715	37967	32207
7591	3436	3552		44670	32821	45260
1694	4054	4031		22380	20026	40053
5817	4116	5210		52151	49055	41613
10218	3449	5554		71114	35658	52811
8519	4974	1654		47267	44132	25878
14241	5002	3739		64052	36097	39119
10763	3418	4628		65907	27122	31211
9249	3907	4812		64067	30962	39761
3090	6187	6200		30998	43900	37413
2785	4994	2981		39789	43110	31856
7685	4060	5944		52588	27188	27448
6936	4912	3681		63306	40017	31266
1825	5592	7219		38704	44500	25607
9647	6006	3931		63772	26969	27364
3593	4109	6022		29977	30336	36339
9769	4735	5270		51543	49318	38058
11374	7602	6676		37708	54837	31993
7667	3925	4825		50638	49431	26845
10999	3807	4049		43993	23125	34411
2259	5849	4592		23362	34667	33498
8197	4906	6167		44078	39620	47207
8990	4703	5923		49409	50112	53603
5441	7018	9508		34361	50742	50036
4835	3883	5303		29893	38242	52182
7235	4481	5716		47497	23422	36389
6241	4354	7063		47278	35304	37175
2245	4964	5071		36283	28526	41667
3459	4140	5875		28445	36625	38634
4905	5100	4222		45334	39395	28223
5433	2935	4302		61334	26074	63461
5595	4323	4229		58965	30717	28169
6817	3915	4399		41838	28508	38052
6533	5122	4669		52483	28741	50885
5801	6708	7581		50476	26378	37901
4679	3742	3638		34930	25047	24780
5760	4821	8055		34286	41138	42675
5600	3450	6158		46857	25960	41016
6566	3995	3853		43840	29472	31213
5508	4241	4342		33033	32747	40919
6791	4120	4541		44695	41707	36944
6217	3887	4678		53939	32900	35113
6183	4022	5705		42166	33137	47676
9090	4845	5064		43543	32457	35596
1874	4012	5425		36261	37203	31764
1475	5521	6150		22550	29584	32409
4462	4029	5686		41490	38463	31607
5731	5729	4487		37082	37024	33580
5567	5329	5501		55087	40172	46160
8930	2346	4726		53511	16515	32705
6299	3835	3327		60162	29066	26099
8227	3978	3504		55828	31926	24468
6649	4344	4361		54365	39336	36075
5160	3565	2098		42940	18023	42262
7982	4124	3751		56747	22467	38510
5572	4558	4840		34804	30168	36675
9800	3552	4195		52011	20949	32312
1975	4864	3875		35471	37239	28984
2138	4458	5087		24359	21146	36201
9522	2724	5842		64413	30081	34767
7843	4651	6053		77001	32077	52781
9101	4800	4442		55601	32032	40823
6486	3975	2998		34825	29206	42575
6905	3882	4160		47187	33800	22188
8544	4283	2962		39570	34597	22703
11353	6472	3829		53662	31785	34750
9400	4209	5652		33337	28595	27094
8139	4173	5765		48821	42717	31703
11045	3604	3543		47270	25199	20779
7012	4810	3085		31512	27763	26066
12270	3634	5281		48167	27260	34492
2026	4426	3357		24125	25352	38214
8472	5586	5198		43209	34606	34196
8689	3337	6280		43870	28125	44566
6426	4347	6189		42127	33851	33123
4486	4882	12591		47491	30855	36507
5977	3195	6779		28311	39933	37358
6169	4583	5745		43736	33570	42627
6379	3340	3851		33744	37661	27274
6252	5198	3263		32573	27940	28765
2503	3062	6225		22548	24388	36448
7181	3699	5303		33918	38577	26085
7412	2770	3653		35158	11718	24121
5173	4405	3650		41753	27061	31763
5772	3566	6055		33544	23304	26461
6205	3754	6675		44762	37196	30038
10072	3828	3754		67454	32263	30056
7452	2286	2550		34135	27104	21207
6670	3154	5716		37874	27437	39778
7405	2860	9240		35687	23967	32497
4159	4933	8322		15844	29485	27795
5614	3187	8544		35308	48586	39230
7076	4911	5354		33362	47403	34851
8694	4147	3378		45261	26808	25231
9905	5448	4407		60754	26470	37972
6321	6784	4700		55823	31419	41263
10758	6605	5095		58805	45405	37228
7467	3542	3774		54322	20341	32046
8652	3927	4824		50382	34016	35105
11537	4823	4805		50693	20007	31941
7350	4953	3084		49613	39839	34947
2029	4388	6366		21022	28329	29787
9405	4919	4542		46538	41355	18318
5654	4724	4127		45463	47409	22095
9338	7680	3637		43321	34034	37287
7904	3553	4562		38667	30497	36499
6558	3562	2712		36520	27571	21515
1359	3866	5179		13301	34053	26767
8519	3817	4620		36529	21816	20097
11380	4450	5819		54356	27876	39934
4105	4540	7842		45792	26147	32564
14510	4310	5766		52055	24519	35935
9636	6199	3771		37173	32387	26703
12619	4923	8266		59564	38622	37288
9286	4250	4733		49095	32521	36312
9467	3127	6584		38537	14648	32982
6579	6289	2278		29292	30527	15312
7886	3894	2241		26181	42417	27257
11561	3838	5491		46528	25930	28955
8520	4450	4151		44164	40675	34822
10434	4833	5838		37096	37586	27955
11131	4840	3434		48387	33892	23950
10475	3804	2340		36859	22491	19336
9175	4674	7667		54026	36590	35136
14535	3426	4720		63765	44102	24570
13035	4851	6709		50025	26959	35161
12926	4190	2569		65458	27386	27701
11827	7516			49411	44526
8901	4275			66980	26592
5477	4580			38546	23177
7145	6897			43302	38027
7526	5483			59058	26828
5621	3639			28127	24351
5020	4249			17831	28420
2883	3996			18946	28816
5295	5012			27100	40648
7355	3619			52501	41838
7777	5457			55558	41986
9287	6596			56502	44179
7496	4654			56384	29461
7144	6849			41283	35085
4032	6289			23461	37530
5444	5252			28701	27056
6756	2685			40154	18147
5634	4127			33786	29968
4914	4610			30399	22331
5082	4372			30209	25914
7281	5706			38522	38932
7318	4174			31028	31612
3773	3217			27303	22080
2251	2061			20096	22189
7996	4254			28249	29314
9641	3594			43198	26862
9546	2260			43057	41895
8304	2111			45694	19660
9484	3942			50387	32160
8883	2549			24371	34956
6385				35454
6681				32956
8547				47050
9343				62733
9692				34950
7722				55317
7317				43109
6525				54318
7658				29714
6341				49677
9506				51375
6561				41470
8036				54627
10161				40240
8667				46649
7536				60427
8868				52414
9810				30665
8371				42017
8636				42151
7177				39740
6627				41741
7806				60894
6589				34757
4416				28336
11741				43620
2880				22359
13942				46902
9493				45048
12399				40054
8362				32072
10224				56606
9263				28510
11434				29021
9106				28050
6801				37145
4210				43616
9421				46929
3536				33922
1851				22573
5694				31626
5284				19910
4970				29606
5590				31968
3894				23539
4917				29931
5690				21499
2633				17911
7061				27055
7290				30161
4553				27114
3237				26017
