# Supplementary material for: Probing the role of synaptic adhesion molecule RTN4RL2 in setting up cochlear connectivity
Source: eLife. 2025 Oct 20;14:RP103481. doi: 10.7554/eLife.103481 (PMC12537009; doi:10.7554/eLife.103481)
Supplement: Figure 4—figure supplement 1—source data 1. [file elife-103481-fig4-figsupp1-data1.xlsx]

## Sheet: Figure 4-figure supplement 1 A
SBEM #ribbons / IHC
	WT-112	KO-110	KO-119
ihc01	8	10	8
ihc02	12	14	14
ihc03	14	10	8
ihc04	10	12	10
ihc05	11	11	8
ihc06	10	9	10

## Sheet: Figure 4-figure supplement 1 B
SBEM Ribbon volume
WT-112	KO-110	KO-119
0.031536	0.0349704	0.0442296
0.0168768	0.028116	0.0342144
0.0204264	0.0336888	0.0127296
0.0183168	0.0230328	0.010404
0.0229032	0.0215712	0.0280584
0.0299376	0.018684	0.0389592
0.0189072	0.030996	0.0243504
0.0217368	0.0182016	0.0345456
0.0173664	0.01836	0.0194832
0.0357768	0.0303912	0.0236664
0.0456768	0.0177984	0.029232
0.0426888	0.016524	0.0223992
0.0266328	0.0272376	0.0102744
0.0315072	0.0344664	0.041364
0.0201888	0.0234648	0.032796
0.0459216	0.0188568	0.0301176
0.0242784	0.0331704	0.0282744
0.0245664	0.0223632	0.0086688
0.0227592	0.0132048	0.0525096
0.0115632	0.0163656	0.0590976
0.0125352	0.0147888	0.0190584
0.0228384	0.0147024	0.0283824
0.0151128	0.0155088	0.0377352
0.0191664	0.0092808	0.0226368
0.0240768	0.016128	0.0273024
0.0214272	0.0202896	0.0203112
0.0312984	0.0116928	0.0176256
0.016632	0.035964	0.0389952
0.0336384	0.026352	0.0267984
0.0096696	0.0256248	0.0592848
0.00936	0.0376488	0.0171936
0.0154944	0.0231984	0.0207576
0.0173592	0.0155664	0.0129528
0.014004	0.0251208	0.0288792
0.01818	0.0142704	0.0250488
0.018	0.017856	0.024084
0.0152496	0.0265176	0.0351288
0.0166896	0.0202608	0.0194832
0.0083808	0.0189	0.0310608
0.0237168	0.0233568	0.0266904
0.0139248	0.015876	0.024516
0.0092952	0.0157392	0.027756
0.0158328	0.0203256	0.011412
0.0228744	0.0350208	0.021348
0.0338904	0.029592	0.0199224
0.0157752	0.0140256	0.0136296
0.0311256	0.0144288	0.0157248
0.0177192	0.0197712	0.0124344
0.0120312	0.01278	0.0164016
0.024624	0.0144864	0.0135144
0.0226728	0.0376344	0.0141624
0.017424	0.0472176	0.02052
0.0163728	0.0245664	0.0127872
0.0155304	0.0243072	0.0216
0.0196848	0.011088	0.0158112
0.0141912	0.0195768	0.0148968
0.0196128	0.0316872
0.0177552	0.0265896
0.0135144	0.018684
0.015264	0.037368
0.0306288	0.0242856
0.0206424	0.0363528
0.0228096	0.025848
0.0262584	0.0295488
0.0136944
