# Supplementary material for: Probing the role of synaptic adhesion molecule RTN4RL2 in setting up cochlear connectivity
Source: eLife. 2025 Oct 20;14:RP103481. doi: 10.7554/eLife.103481 (PMC12537009; doi:10.7554/eLife.103481)
Supplement: Figure 4—source data 1. [file elife-103481-fig4-data1.xlsx]

## Sheet: Figure 4E, F
		non-type1	# total type1 SGN (per bundle)	# type1 SGN with ribbon	# type1 SNG without ribbon	# type1 SGN without ribbon not reach ihc	# type1 SGN without ribbon reach ihc	%type1 SGN with ribbon	# type1 SGN without ribbon/animal	# total type 1 SGN/animal	% type1 SGN without ribbon/animal	# branched type1 SNG	# unbranched type1 SNG	% unbranched type1 SGN
WT-112	Habenula Perforata1	0	11	10	1	1	0	0.909091	3	32	0.09375	1	10	0.909091
	Habenula Perforata2	1	12	10	2	2	0	0.833333				1	11	0.916667
	Habenula Perforata3	0	9	9	0	0	0	1				0	9	1
Ngr2-KO1-110	Habenula Perforata1	0	16	13	3	3	0	0.8125	17	51	0.333333	1	15	0.9375
	Habenula Perforata2	8	24	16	9	5	4	0.666667				1	23	0.958333
	Habenula Perforata3	0	11	6	5	5	0	0.545455				0	11	1
Ngr2-KO2-119	Habenula Perforata1	3	13	9	4	2	2	0.692308	6	32	0.1875	1	12	0.923077
	Habenula Perforata2	3	10	9	1	1	0	0.9				0	10	1
	Habenula Perforata3	3	9	8	1	1	0	0.888889				0	9	1
