# Supplementary material for: Probing the role of synaptic adhesion molecule RTN4RL2 in setting up cochlear connectivity
Source: eLife. 2025 Oct 20;14:RP103481. doi: 10.7554/eLife.103481 (PMC12537009; doi:10.7554/eLife.103481)
Supplement: Figure 5—source data 1. [file elife-103481-fig5-data1.xlsx]

## Sheet: Figure 5B
IV curves
WT																			KO
Voltage (mV)	IV_1 (A)	IV_2 (A)	IV_3 (A)	IV_4 (A)	IV_5 (A)	IV_6 (A)	IV_7 (A)	IV_8 (A)	IV_9 (A)	IV_10 (A)	IV_11 (A)	IV_12 (A)	IV_13 (A)	IV_14 (A)	mean	st dev	st error		IV_1 (A)	IV_2 (A)	IV_3 (A)	IV_4 (A)	IV_5 (A)	IV_6 (A)	IV_7 (A)	IV_8 (A)	IV_9 (A)	IV_10 (A)	IV_11 (A)	IV_12 (A)	IV_13 (A)	IV_14 (A)	IV_15 (A)	IV_16 (A)	IV_17 (A)	IV_18 (A)	IV_19 (A)	IV_20 (A)	IV_21 (A)	IV_22 (A)	IV_23 (A)	IV_24 (A)	IV_25 (A)	mean	st dev	st error
-82	-5.88153e-13	-4.76589e-12	-4.53252e-12	-2.78283e-12	-3.59588e-12	-8.95252e-13	-9.34086e-13	-3.19251e-12	4.89602e-13	-2.77083e-12	-2.46091e-12	-4.99182e-13	-9.97135e-13	-1.3255e-12	-2.06079e-12	1.60915e-12	4.46297e-13		-3.13502e-12	-2.12538e-12	2.12919e-13	-1.93511e-12	-1.64194e-11	-4.15824e-12	2.46051e-12	1.02658e-12	-4.38244e-12	9.18667e-13	-1.94918e-12	-1.55762e-12	-1.28633e-12	-1.69824e-12	-7.22536e-13	-1.30678e-12	-2.2147e-12	-1.05786e-12	-3.76625e-12	-2.24031e-12	-4.79924e-12	-2.17592e-12	3.7525e-13	-4.59826e-12	-5.77187e-12	-2.49227e-12	3.52067e-12	7.18654e-13
-77	-2.27562e-12	5.36537e-12	9.14298e-13	-2.2485e-12	3.33826e-12	3.54957e-13	-7.01726e-12	-1.38635e-12	-1.66884e-12	2.03871e-12	-2.27743e-12	3.31601e-12	6.52133e-12	-3.60907e-12	9.7561e-14	3.72966e-12	1.03442e-12		-4.5167e-12	3.70999e-12	-9.02702e-12	3.18846e-13	-1.26227e-11	-2.94056e-12	4.87765e-12	1.54307e-12	-1.17931e-12	4.36528e-12	-1.95995e-12	-1.10573e-12	-3.00069e-12	5.62261e-13	8.69861e-13	-6.24959e-12	-1.43569e-12	-2.60588e-12	8.17229e-12	-5.99599e-12	1.09165e-12	-3.8581e-13	-6.01812e-12	7.72753e-13	-1.27589e-11	-1.82076e-12	5.05885e-12	1.03263e-12
-72	4.17039e-12	3.30067e-12	-3.17645e-12	1.83935e-12	1.95423e-12	1.8964e-12	-6.43306e-12	2.68979e-12	-9.12767e-12	-4.6308e-12	-2.24308e-13	3.76481e-12	3.44403e-12	-7.10934e-12	-5.45854e-13	4.59941e-12	1.27565e-12		3.71235e-12	8.80314e-13	-2.42886e-12	4.35963e-15	-1.8588e-11	-1.01499e-11	5.39129e-12	5.14873e-12	-1.81721e-12	1.74825e-12	-4.55164e-13	2.64311e-12	5.31759e-13	-7.6422e-13	6.151e-12	3.32332e-12	2.00151e-12	4.5435e-12	1.32201e-12	-6.42177e-12	5.74222e-12	4.04112e-12	-3.81549e-12	2.55077e-12	-7.32008e-12	-8.10031e-14	5.69827e-12	1.16315e-12
-67	8.3541e-12	3.2585e-12	-1.96742e-13	1.86051e-12	-1.48716e-12	-3.7645e-12	-4.16199e-12	-4.49222e-13	5.83342e-13	3.07389e-12	-4.66532e-12	3.12656e-12	1.37102e-12	5.53094e-13	5.32577e-13	3.47917e-12	9.64949e-13		-2.6801e-12	2.08802e-12	5.32935e-12	1.23237e-12	-1.46227e-11	-3.17074e-12	6.79135e-12	4.0641e-12	3.5286e-12	9.86497e-12	-2.51175e-12	3.10417e-12	8.76641e-13	-5.25497e-13	1.8297e-12	-7.6605e-12	-1.99958e-12	8.29403e-12	-2.64064e-12	-4.41703e-12	4.36247e-12	1.8874e-12	9.26767e-12	-3.7021e-12	-9.23401e-12	3.74247e-13	5.84521e-12	1.19315e-12
-62	3.309e-12	5.2546e-13	-5.9008e-14	-1.68529e-12	8.6523e-12	1.8914e-13	-4.45641e-12	-2.73132e-12	-7.7999e-14	-3.49285e-14	1.17464e-12	4.23351e-12	4.3646e-12	-4.60239e-12	6.28664e-13	3.61934e-12	1.00383e-12		-1.11168e-11	-2.87796e-12	-9.81062e-12	1.49605e-12	-1.32746e-11	-4.15157e-12	6.71861e-12	1.85465e-12	-2.89087e-12	6.68598e-12	-3.21498e-12	-2.36231e-12	-1.90236e-12	9.91881e-13	-4.3361e-13	-6.88353e-12	5.62945e-13	2.88743e-12	-9.02285e-13	-4.50783e-13	4.10601e-12	1.80057e-12	1.03951e-12	-1.40646e-12	-8.05519e-12	-1.66361e-12	5.09109e-12	1.03921e-12
-57	7.70058e-12	-2.87187e-12	6.07657e-13	-6.61654e-12	2.046e-12	-9.6764e-13	-6.455e-12	-8.13893e-13	-1.15619e-11	-3.31958e-12	-1.10352e-11	1.20179e-12	8.43469e-12	-6.00701e-12	-2.11842e-12	6.02215e-12	1.67024e-12		-1.34605e-11	6.80525e-13	9.08197e-12	-1.49824e-12	-1.92382e-11	-6.37492e-12	8.34903e-12	-1.23526e-12	1.83394e-12	3.66601e-12	-2.13839e-12	2.11369e-12	3.39481e-12	-1.12963e-12	-1.20777e-12	-1.62046e-12	-1.59264e-12	7.72511e-12	1.11989e-12	-1.15738e-11	7.07083e-12	3.57573e-12	-8.48163e-12	-4.62957e-12	-6.7658e-12	-1.29341e-12	6.91801e-12	1.41213e-12
-52	-7.75556e-14	-1.1966e-11	-9.84214e-12	-9.14428e-12	-9.73212e-12	-7.93514e-12	-3.89891e-12	-1.29097e-11	-7.04581e-12	-1.07354e-11	-3.5145e-11	-6.07305e-12	-2.86595e-12	-3.71055e-12	-9.36297e-12	8.29659e-12	2.30106e-12		-1.02737e-11	-7.39431e-13	-2.14249e-13	-3.22571e-12	-2.05613e-11	-8.66696e-12	9.25033e-12	-8.89748e-12	-2.86355e-12	1.81756e-13	-9.26246e-12	-7.64176e-12	-7.41246e-12	-6.45957e-12	-3.45646e-12	-1.52945e-11	-7.66035e-12	-9.61465e-14	-6.86023e-12	-9.57454e-12	1.11303e-12	-1.03055e-12	-7.44386e-12	-9.51048e-12	-1.78683e-11	-6.17876e-12	6.40495e-12	1.30741e-12
-47	-2.34315e-11	-2.49941e-11	-2.10731e-11	-2.13794e-11	-3.0196e-11	-8.02927e-12	-2.35397e-11	-3.74335e-11	-2.3911e-11	-3.06585e-11	-7.37141e-11	-2.13942e-11	-1.47917e-11	-1.79552e-11	-2.66072e-11	1.52912e-11	4.24101e-12		-2.71988e-11	-6.11844e-12	-1.8787e-11	-5.25767e-12	-2.75648e-11	-1.33806e-11	6.02167e-12	-2.4522e-11	-8.09792e-12	-1.06645e-11	-1.62309e-11	-2.10474e-11	-2.45434e-11	-1.51459e-11	-1.71455e-11	-2.6614e-11	-1.16088e-11	-2.3781e-11	-1.48338e-11	-6.53538e-12	-9.92419e-12	-1.99448e-11	-2.24114e-11	-1.87024e-11	-3.09187e-11	-1.65983e-11	8.7412e-12	1.78429e-12
-42	-5.27594e-11	-6.05804e-11	-4.41373e-11	-5.37905e-11	-4.74195e-11	-2.30103e-11	-3.25595e-11	-6.46253e-11	-4.61124e-11	-6.88405e-11	-1.22797e-10	-5.60767e-11	-4.4453e-11	-4.28569e-11	-5.4287e-11	2.31257e-11	6.4139e-12		-2.95259e-11	-1.54599e-11	-1.68866e-11	-2.04177e-11	-3.90617e-11	-2.99228e-11	-5.64047e-12	-5.93746e-11	-2.6654e-11	-2.73052e-11	-3.23111e-11	-4.57519e-11	-4.73698e-11	-4.17071e-11	-3.447e-11	-3.92259e-11	-3.20266e-11	-5.24615e-11	-3.16044e-11	-2.21871e-11	-3.23476e-11	-4.54293e-11	-4.79045e-11	-4.30768e-11	-5.45665e-11	-3.49076e-11	1.31314e-11	2.68043e-12
-37	-9.85823e-11	-1.13383e-10	-8.27749e-11	-8.55441e-11	-7.98901e-11	-4.65e-11	-5.60993e-11	-1.13594e-10	-7.88628e-11	-1.08507e-10	-1.67013e-10	-1.00195e-10	-8.03151e-11	-7.39523e-11	-9.1801e-11	2.93524e-11	8.14088e-12		-5.42247e-11	-3.31267e-11	-3.57777e-11	-4.01901e-11	-6.86745e-11	-5.83414e-11	-2.53409e-11	-1.07906e-10	-4.05438e-11	-7.54736e-11	-7.08095e-11	-8.75845e-11	-9.70873e-11	-7.94174e-11	-6.03385e-11	-7.08948e-11	-5.62784e-11	-9.85698e-11	-5.78384e-11	-3.07234e-11	-6.91444e-11	-9.10071e-11	-8.07533e-11	-8.64724e-11	-9.93639e-11	-6.70353e-11	2.37416e-11	4.84623e-12
-32	-1.42746e-10	-1.48874e-10	-1.33378e-10	-1.23706e-10	-1.18532e-10	-6.86293e-11	-8.76662e-11	-1.74677e-10	-1.26615e-10	-1.67415e-10	-2.1671e-10	-1.4116e-10	-1.24067e-10	-1.1192e-10	-1.34721e-10	3.65432e-11	1.01353e-11		-8.48964e-11	-6.69722e-11	-6.28815e-11	-7.66452e-11	-1.1522e-10	-9.05749e-11	-5.45384e-11	-1.61918e-10	-7.63231e-11	-1.33297e-10	-9.21615e-11	-1.31927e-10	-1.50355e-10	-1.21338e-10	-9.23941e-11	-1.07572e-10	-7.40164e-11	-1.42664e-10	-9.14502e-11	-5.68597e-11	-1.23081e-10	-1.49405e-10	-1.27595e-10	-1.31632e-10	-1.58282e-10	-1.0696e-10	3.33357e-11	6.80462e-12
-27	-1.85031e-10	-1.89125e-10	-1.7395e-10	-1.61315e-10	-1.48535e-10	-8.97795e-11	-1.26217e-10	-2.22767e-10	-1.62709e-10	-2.24775e-10	-2.38708e-10	-1.81221e-10	-1.7224e-10	-1.60855e-10	-1.74088e-10	3.92575e-11	1.08881e-11		-1.23155e-10	-8.55898e-11	-1.02951e-10	-1.23737e-10	-1.70425e-10	-1.40135e-10	-9.39457e-11	-2.05123e-10	-1.15033e-10	-1.99012e-10	-1.39993e-10	-1.70333e-10	-1.90551e-10	-1.57541e-10	-1.23591e-10	-1.43027e-10	-9.90968e-11	-1.84483e-10	-1.17004e-10	-8.2857e-11	-1.74887e-10	-2.02273e-10	-1.68981e-10	-1.70672e-10	-1.99951e-10	-1.47374e-10	3.9207e-11	8.00311e-12
-22	-2.08334e-10	-2.21752e-10	-2.12937e-10	-1.85436e-10	-1.6931e-10	-1.08411e-10	-1.64877e-10	-2.56101e-10	-1.7529e-10	-2.53312e-10	-2.59139e-10	-2.01469e-10	-1.99211e-10	-1.79491e-10	-1.99648e-10	4.11426e-11	1.14109e-11		-1.50436e-10	-1.2646e-10	-1.38066e-10	-1.63921e-10	-2.19161e-10	-1.77122e-10	-1.28273e-10	-2.30906e-10	-1.47766e-10	-2.50616e-10	-1.70366e-10	-1.96447e-10	-2.23398e-10	-1.88623e-10	-1.40822e-10	-1.63326e-10	-1.22777e-10	-2.07459e-10	-1.47398e-10	-8.9457e-11	-2.05609e-10	-2.41815e-10	-1.7532e-10	-2.07583e-10	-2.31051e-10	-1.77767e-10	4.26989e-11	8.71588e-12
-17	-2.17989e-10	-2.28543e-10	-2.28179e-10	-1.99351e-10	-1.64465e-10	-1.19142e-10	-1.83844e-10	-2.7113e-10	-1.82071e-10	-2.7185e-10	-2.50403e-10	-2.00649e-10	-2.06656e-10	-1.90395e-10	-2.0819e-10	4.1395e-11	1.14809e-11		-1.54873e-10	-1.41991e-10	-1.68707e-10	-1.9638e-10	-2.51708e-10	-1.93739e-10	-1.59428e-10	-2.31515e-10	-1.68547e-10	-2.75623e-10	-1.94125e-10	-2.06018e-10	-2.3259e-10	-1.99291e-10	-1.47304e-10	-1.93888e-10	-1.30767e-10	-2.18505e-10	-1.61845e-10	-1.09525e-10	-2.27031e-10	-2.63351e-10	-1.97729e-10	-2.18708e-10	-2.3989e-10	-1.95323e-10	4.24866e-11	8.67254e-12
-12	-2.08786e-10	-2.20976e-10	-2.28351e-10	-1.88994e-10	-1.55261e-10	-1.22849e-10	-1.85551e-10	-2.59169e-10	-1.76489e-10	-2.65919e-10	-2.29813e-10	-1.97374e-10	-2.12796e-10	-1.94117e-10	-2.03318e-10	3.81734e-11	1.05874e-11		-1.56762e-10	-1.54629e-10	-1.73609e-10	-2.16233e-10	-2.61642e-10	-2.07589e-10	-1.75225e-10	-2.23009e-10	-1.89156e-10	-2.77814e-10	-1.93691e-10	-2.00424e-10	-2.24578e-10	-1.96072e-10	-1.44313e-10	-1.8479e-10	-1.37261e-10	-2.07927e-10	-1.57312e-10	-1.11059e-10	-2.29172e-10	-2.6104e-10	-1.85788e-10	-2.15857e-10	-2.32538e-10	-1.967e-10	4.06211e-11	8.29175e-12
-7	-1.93869e-10	-2.12696e-10	-2.20115e-10	-1.81106e-10	-1.40192e-10	-1.17139e-10	-1.86559e-10	-2.41508e-10	-1.50549e-10	-2.45993e-10	-2.15059e-10	-1.82717e-10	-1.97132e-10	-1.83806e-10	-1.90603e-10	3.66137e-11	1.01548e-11		-1.5329e-10	-1.45987e-10	-1.852e-10	-2.09957e-10	-2.51078e-10	-2.06289e-10	-1.80063e-10	-2.03833e-10	-1.77977e-10	-2.62601e-10	-1.81505e-10	-1.87307e-10	-2.15155e-10	-1.84576e-10	-1.31723e-10	-1.82402e-10	-1.34774e-10	-1.93626e-10	-1.51257e-10	-1.06215e-10	-2.05333e-10	-2.40753e-10	-1.70311e-10	-1.97539e-10	-2.24542e-10	-1.87332e-10	3.73373e-11	7.62144e-12
-2	-1.66476e-10	-1.88702e-10	-2.01774e-10	-1.64811e-10	-1.34057e-10	-1.04404e-10	-1.68628e-10	-2.1854e-10	-1.36452e-10	-2.27017e-10	-1.78601e-10	-1.53068e-10	-1.69463e-10	-1.59535e-10	-1.69395e-10	3.30422e-11	9.16426e-12		-1.43768e-10	-1.40888e-10	-1.72917e-10	-1.96596e-10	-2.33267e-10	-1.93048e-10	-1.67979e-10	-1.77306e-10	-1.6036e-10	-2.36818e-10	-1.74439e-10	-1.66859e-10	-1.90088e-10	-1.73277e-10	-1.1284e-10	-1.60565e-10	-1.20876e-10	-1.67064e-10	-1.43935e-10	-9.3819e-11	-1.90231e-10	-2.15478e-10	-1.4198e-10	-1.87459e-10	-2.02852e-10	-1.70588e-10	3.46069e-11	7.0641e-12
3	-1.35846e-10	-1.59332e-10	-1.7574e-10	-1.41358e-10	-9.758e-11	-8.81422e-11	-1.47845e-10	-1.82725e-10	-1.2423e-10	-1.84515e-10	-1.55342e-10	-1.23775e-10	-1.52577e-10	-1.42573e-10	-1.43684e-10	2.87556e-11	7.97536e-12		-1.1489e-10	-1.19442e-10	-1.63072e-10	-1.75883e-10	-2.07003e-10	-1.70594e-10	-1.53249e-10	-1.46622e-10	-1.43254e-10	-2.0365e-10	-1.47139e-10	-1.41527e-10	-1.63079e-10	-1.42079e-10	-9.39389e-11	-1.34153e-10	-1.05492e-10	-1.36122e-10	-1.15007e-10	-8.51633e-11	-1.64459e-10	-1.89372e-10	-1.36833e-10	-1.5437e-10	-1.68589e-10	-1.46999e-10	3.09626e-11	6.32021e-12
8	-1.13886e-10	-1.34164e-10	-1.48804e-10	-1.23322e-10	-8.25954e-11	-7.41445e-11	-1.27176e-10	-1.57871e-10	-8.98979e-11	-1.5662e-10	-1.19003e-10	-1.04544e-10	-1.19418e-10	-1.1952e-10	-1.19355e-10	2.56425e-11	7.11196e-12		-1.04966e-10	-9.60757e-11	-1.22501e-10	-1.53353e-10	-1.80262e-10	-1.47225e-10	-1.30269e-10	-1.18119e-10	-1.24683e-10	-1.68042e-10	-1.30558e-10	-1.12785e-10	-1.41463e-10	-1.17865e-10	-7.47405e-11	-1.15183e-10	-9.18801e-11	-1.13527e-10	-9.23061e-11	-6.25387e-11	-1.35186e-10	-1.52482e-10	-9.91978e-11	-1.32777e-10	-1.47218e-10	-1.22608e-10	2.79754e-11	5.71045e-12
13	-8.196e-11	-1.10697e-10	-1.23609e-10	-8.92668e-11	-6.46204e-11	-5.67736e-11	-1.09649e-10	-1.27996e-10	-7.23049e-11	-1.24253e-10	-8.30013e-11	-7.39395e-11	-9.43433e-11	-9.04199e-11	-9.30596e-11	2.30089e-11	6.38151e-12		-7.99956e-11	-8.317e-11	-1.0498e-10	-1.29371e-10	-1.54467e-10	-1.21181e-10	-1.058e-10	-9.01281e-11	-1.00341e-10	-1.32507e-10	-9.93218e-11	-8.89269e-11	-1.05171e-10	-9.25734e-11	-5.17188e-11	-9.28605e-11	-6.89689e-11	-8.15218e-11	-7.82416e-11	-5.63686e-11	-1.05109e-10	-1.18141e-10	-6.90349e-11	-1.0142e-10	-1.12552e-10	-9.69548e-11	2.38785e-11	4.87417e-12
18	-5.38074e-11	-8.32383e-11	-9.37656e-11	-6.7225e-11	-4.01984e-11	-3.7327e-11	-7.67065e-11	-9.54933e-11	-4.80425e-11	-9.09742e-11	-5.90021e-11	-5.34357e-11	-7.43605e-11	-7.24396e-11	-6.75726e-11	1.94548e-11	5.39578e-12		-6.49817e-11	-6.30002e-11	-7.36886e-11	-1.03234e-10	-1.15582e-10	-9.13317e-11	-8.37186e-11	-5.84537e-11	-7.64859e-11	-1.00997e-10	-7.96959e-11	-6.15899e-11	-7.90347e-11	-6.45631e-11	-3.13201e-11	-8.29322e-11	-5.35609e-11	-5.37679e-11	-5.34198e-11	-4.01697e-11	-7.55358e-11	-9.23879e-11	-6.37905e-11	-8.24673e-11	-9.28843e-11	-7.35437e-11	2.00237e-11	4.08733e-12
23	-4.10707e-11	-5.68109e-11	-6.9366e-11	-5.211e-11	-3.38215e-11	-2.66275e-11	-5.02444e-11	-7.53914e-11	-3.38388e-11	-6.01497e-11	-3.59348e-11	-3.12264e-11	-4.92485e-11	-4.81762e-11	-4.74298e-11	1.46348e-11	4.05896e-12		-5.12574e-11	-4.2758e-11	-4.36315e-11	-7.73657e-11	-8.6705e-11	-7.82028e-11	-5.8804e-11	-3.09439e-11	-6.18704e-11	-7.11029e-11	-6.08276e-11	-4.12832e-11	-5.51422e-11	-4.01206e-11	-1.59572e-11	-4.97081e-11	-3.54179e-11	-4.14246e-11	-3.10222e-11	-2.77254e-11	-4.91443e-11	-5.9442e-11	-4.75024e-11	-6.53538e-11	-6.93402e-11	-5.16821e-11	1.74008e-11	3.55193e-12
28	-1.5881e-11	-3.71342e-11	-5.19704e-11	-1.9951e-11	-1.16745e-11	-1.34018e-11	-3.87084e-11	-4.68426e-11	-1.57886e-11	-3.68225e-11	-9.1201e-12	-1.71967e-11	-2.73262e-11	-2.37222e-11	-2.611e-11	1.38338e-11	3.83681e-12		-3.84451e-11	-2.22171e-11	-4.52625e-11	-5.91401e-11	-5.1638e-11	-5.07378e-11	-3.71864e-11	-8.41883e-12	-3.53177e-11	-4.89577e-11	-3.8588e-11	-1.93443e-11	-2.93901e-11	-2.10222e-11	-1.82624e-12	-3.13654e-11	-1.92794e-11	-1.58017e-11	-2.04024e-11	-1.03042e-11	-2.93068e-11	-3.09842e-11	-2.79834e-11	-3.60661e-11	-5.17842e-11	-3.12308e-11	1.49398e-11	3.04958e-12
33	1.39143e-12	-1.84821e-11	-2.87134e-11	-8.42444e-12	-8.81001e-12	2.72723e-12	-9.36577e-12	-2.95505e-11	-4.41802e-12	-1.4277e-11	8.7722e-12	1.93322e-12	-1.94068e-11	-9.43909e-12	-9.71879e-12	1.15437e-11	3.20165e-12		-1.37738e-11	-1.16855e-11	-2.37417e-11	-4.285e-11	-2.13892e-11	-2.61572e-11	-1.96534e-11	1.24467e-11	-2.03562e-11	-1.99502e-11	-2.40706e-11	-3.32511e-12	-1.56967e-11	-5.42252e-13	1.20207e-11	-1.33001e-11	-8.40327e-12	1.46925e-12	-7.22362e-12	-2.47637e-12	-4.4197e-12	-1.35287e-11	-1.22556e-11	-2.22011e-11	-4.29639e-11	-1.37611e-11	1.36447e-11	2.78521e-12
38	1.88281e-11	-1.62381e-12	-1.04662e-11	9.14339e-13	1.7937e-11	9.02541e-12	-7.02023e-12	-1.53697e-11	1.87359e-11	1.44554e-11	2.82494e-11	1.82868e-11	2.8143e-13	3.13254e-12	6.81189e-12	1.30352e-11	3.61531e-12		5.61538e-12	5.50794e-13	-1.39585e-11	-1.98118e-11	4.29317e-12	-1.85329e-11	1.02202e-12	3.0437e-11	-6.30999e-12	-4.40735e-13	-1.04041e-11	8.30595e-12	2.33097e-12	1.72526e-11	2.09173e-11	-4.72892e-12	4.76662e-12	1.83612e-11	1.5832e-11	1.19408e-11	8.14711e-12	3.32125e-12	-9.61908e-12	-1.1847e-11	-1.56259e-11	1.6726e-12	1.31123e-11	2.67653e-12
43	3.02919e-11	1.3418e-11	-3.98075e-12	1.74052e-11	2.47162e-11	1.4138e-11	1.3939e-11	-2.78534e-12	2.94606e-11	2.72622e-11	3.59598e-11	2.65303e-11	1.3856e-11	1.94572e-11	1.85477e-11	1.17398e-11	3.25603e-12		1.71375e-11	1.11694e-11	-1.96719e-12	-9.43485e-12	3.39255e-11	-1.42092e-11	1.54468e-11	4.40164e-11	5.91251e-12	2.21781e-11	-6.63982e-12	2.28231e-11	2.3052e-11	2.41436e-11	3.26034e-11	1.37909e-11	2.01269e-11	3.05366e-11	1.83604e-11	1.72254e-11	1.97407e-11	1.57081e-11	2.40157e-11	7.184e-12	-1.33921e-11	1.49382e-11	1.49113e-11	3.04376e-12
48	4.26601e-11	2.47897e-11	1.43036e-11	3.48227e-11	4.20326e-11	2.85153e-11	3.3533e-11	1.25012e-11	2.40684e-11	4.31948e-11	4.83383e-11	3.22171e-11	2.27856e-11	3.28443e-11	3.11862e-11	1.07906e-11	2.99276e-12		2.45338e-11	2.74397e-11	1.49613e-11	3.13478e-12	7.08487e-11	1.17567e-11	3.59869e-11	5.06656e-11	1.95708e-11	2.84641e-11	1.03901e-11	3.86889e-11	2.54777e-11	3.64478e-11	3.96388e-11	2.00991e-11	1.98362e-11	4.30985e-11	2.63914e-11	2.8388e-11	3.52572e-11	2.85943e-11	2.82703e-11	1.77494e-11	6.15315e-12	2.76737e-11	1.46904e-11	2.99866e-12
53	4.34841e-11	2.66343e-11	2.63211e-11	3.73055e-11	5.02134e-11	3.10779e-11	3.946e-11	1.99853e-11	4.38902e-11	6.25367e-11	6.26887e-11	4.33422e-11	2.82252e-11	3.65571e-11	3.94087e-11	1.29036e-11	3.57882e-12		4.31665e-11	3.7963e-11	9.02914e-12	1.3505e-11	8.27868e-11	2.37283e-11	4.56582e-11	6.04815e-11	2.93944e-11	4.48788e-11	1.44789e-11	4.65189e-11	4.44621e-11	4.8905e-11	5.32618e-11	2.57784e-11	3.15117e-11	4.38741e-11	3.61932e-11	4.02581e-11	4.55516e-11	4.17903e-11	4.27558e-11	2.07813e-11	2.07309e-11	3.78978e-11	1.6206e-11	3.30803e-12
58	6.89418e-11	4.1055e-11	3.08525e-11	5.25764e-11	5.7065e-11	4.2145e-11	4.77548e-11	3.19041e-11	5.64199e-11	7.02028e-11	7.00955e-11	5.13998e-11	3.52901e-11	4.53382e-11	5.00744e-11	1.34433e-11	3.7285e-12		5.27254e-11	4.42918e-11	3.00497e-11	2.55145e-11	1.00973e-10	3.52529e-11	6.0019e-11	6.80774e-11	4.1833e-11	5.7559e-11	3.07208e-11	4.86328e-11	5.48441e-11	5.60079e-11	5.40911e-11	4.01039e-11	4.50779e-11	6.82896e-11	4.44346e-11	4.61204e-11	5.38922e-11	5.18345e-11	4.48264e-11	3.28481e-11	2.64302e-11	4.8578e-11	1.60745e-11	3.28119e-12
63	9.91622e-11	5.2038e-11	4.09254e-11	6.83677e-11	6.51676e-11	4.81554e-11	6.30574e-11	3.3734e-11	5.19932e-11	7.86944e-11	7.67196e-11	5.78684e-11	4.56543e-11	6.19092e-11	6.02462e-11	1.71048e-11	4.74401e-12		5.43785e-11	5.44124e-11	3.39134e-11	3.01628e-11	1.19718e-10	4.81257e-11	7.4704e-11	7.55108e-11	4.17959e-11	5.99922e-11	4.00783e-11	6.12176e-11	6.27111e-11	6.10091e-11	6.67481e-11	4.32191e-11	4.50767e-11	9.83467e-11	4.87336e-11	5.37528e-11	5.87169e-11	6.37525e-11	5.88171e-11	3.69103e-11	4.48872e-11	5.74677e-11	1.97277e-11	4.02691e-12

## Sheet: Figure 5C
Whole cell maximal Ca2+ current
WT	KO
-2.17989e-10	-1.56762e-10
-2.28543e-10	-1.54629e-10
-2.28351e-10	-1.852e-10
-1.99351e-10	-2.16233e-10
-1.6931e-10	-2.61642e-10
-1.22849e-10	-2.07589e-10
-1.86559e-10	-1.80063e-10
-2.7113e-10	-2.31515e-10
-1.82071e-10	-1.89156e-10
-2.7185e-10	-2.77814e-10
-2.59139e-10	-1.94125e-10
-2.01469e-10	-2.06018e-10
-2.12796e-10	-2.3259e-10
-1.94117e-10	-1.99291e-10
	-1.47304e-10
	-1.93888e-10
	-1.37261e-10
	-2.18505e-10
	-1.61845e-10
	-1.11059e-10
	-2.29172e-10
	-2.63351e-10
	-1.97729e-10
	-2.18708e-10
	-2.3989e-10

## Sheet: Figure 5D
Whole cell fractional activation curves
WT																			KO
Voltage	Frac_Act_1	Frac_Act_2	Frac_Act_3	Frac_Act_4	Frac_Act_5	Frac_Act_6	Frac_Act_7	Frac_Act_8	Frac_Act_9	Frac_Act_10	Frac_Act_11	Frac_Act_12	Frac_Act_13	Frac_Act_14	mean	st dev	st error		Frac_Act_1	Frac_Act_2	Frac_Act_3	Frac_Act_4	Frac_Act_5	Frac_Act_6	Frac_Act_7	Frac_Act_8	Frac_Act_9	Frac_Act_10	Frac_Act_11	Frac_Act_12	Frac_Act_13	Frac_Act_14	Frac_Act_15	Frac_Act_16	Frac_Act_17	Frac_Act_18	Frac_Act_19	Frac_Act_20	Frac_Act_21	Frac_Act_22	Frac_Act_23	Frac_Act_24	Frac_Act_25	mean	st dev	st error
-82	0.00100382	0.00787737	0.00718555	0.00515671	0.00796083	0.0024883	0.00168145	0.00471126	-0.000937837	0.00368584	0.00361553	0.000892359	0.00168226	0.0024288	0.00353087	0.00275119	0.000763042		0.00725399	0.00474347	-0.000320508	0.00326464	0.0228393	0.00715021	-0.00801563	-0.0015892	0.00874341	-0.00118724	0.00360851	0.00270691	0.00203444	0.0028483	0.00166175	0.00263402	0.0054645	0.00180855	0.00762289	0.00683132	0.00727723	0.00293212	-0.000705661	0.00796815	0.00922148	0.00427188	0.00554465	0.0011318
-77	0.00406521	-0.00926676	-0.0015137	0.00435566	-0.00773024	-0.00103238	0.0132017	0.00213633	0.00334671	-0.00283566	0.00350508	-0.00620646	-0.0115046	0.00691359	-0.000183254	0.00686722	0.00190462		0.0109059	-0.00865072	0.0142195	-0.000561124	0.0183257	0.00527568	0.00982217	-0.00250222	0.00245601	-0.00589708	0.00378878	0.00201079	0.00496245	-0.000986776	-0.0020973	0.0131515	0.00370353	0.00466307	-0.0173073	0.0191159	-0.00173177	0.000543711	0.0118341	-0.00139807	0.0212835	0.0041972	0.00909015	0.00185552
-72	-0.00781495	-0.00596897	0.00550274	-0.00373248	-0.00474336	-0.00578415	0.0126744	-0.00433663	0.019206	0.0067489	0.00036246	-0.00739398	-0.00636661	0.0142669	0.000901447	0.00910722	0.00252589		-0.00937161	-0.00214886	0.00401234	-8.01834e-06	0.0282198	0.0190356	0.0319662	-0.00876546	0.00395808	-0.0024738	0.000920552	-0.00504048	-0.000921466	0.00140647	-0.0155839	-0.00731548	-0.0054092	-0.00852841	-0.00293581	0.0214499	-0.0095505	-0.00596852	0.00786201	-0.00482754	0.0127743	0.00171025	0.0122234	0.0024951
-67	-0.0164611	-0.00618366	0.000357401	-0.00396386	0.00379242	0.0120696	0.0086066	0.000759392	-0.00129101	-0.00470472	0.00793491	-0.00645903	-0.00266186	-0.0011654	-0.000669312	0.00728755	0.0020212		0.0070883	-0.00534749	-0.00925455	-0.00237365	0.0232633	0.00622895	0.00932468	-0.00728208	-0.00805513	-0.0146545	0.00532614	-0.00622262	-0.0015954	0.00101658	-0.00488376	0.0176765	0.00567444	-0.0163699	0.00616366	0.0154928	-0.00762497	-0.0029282	-0.0200566	0.00734505	0.0168938	0.000593811	0.0110951	0.00226477
-62	-0.00687415	-0.00104896	0.000112672	0.00377918	-0.023241	-0.000639119	0.00969627	0.00485257	0.00018205	5.6285e-05	-0.00210868	-0.00922437	-0.00892247	0.0102076	-0.00165515	0.00857451	0.00237814		0.0308736	0.00775167	0.0179558	-0.00302438	0.0221812	0.00856244	-0.00708106	-0.00350725	0.00693257	-0.0104528	0.0071646	0.00499082	0.0036452	-0.00202222	0.00122281	0.016689	-0.00168169	-0.00600828	0.00221944	0.0016645	-0.00756158	-0.00294188	-0.00236875	0.0029321	0.0154863	0.00414488	0.0100841	0.00205841
-57	-0.0169157	0.00604713	-0.00122278	0.0156599	-0.00580535	0.00345613	0.014818	0.00152367	0.0285445	0.00564775	0.0209735	-0.00277014	-0.0182066	0.0140626	0.0047009	0.0134481	0.00372984		0.0393524	-0.00193292	-0.0175704	0.00318678	0.0338493	0.0138379	0.0111923	0.00247292	-0.00463184	-0.00604857	0.00502117	-0.00472009	-0.0068682	0.00243424	0.00361015	0.00413864	0.00502231	-0.0169973	-0.00291143	0.0451151	-0.0137594	-0.00617003	0.0204076	0.0101676	0.013704	0.00527609	0.0159762	0.00326113
-52	0.000180742	0.0266567	0.0209327	0.022913	0.0292623	0.0300555	0.0094717	0.0255397	0.0184616	0.0193439	0.0709646	0.0148586	0.00655245	0.00919713	0.0217422	0.0167712	0.00465151		0.0317065	0.00222136	0.000439568	0.00723869	0.0382013	0.0198551	0.0316709	0.0189219	0.00763849	-0.000317445	0.0229829	0.0180963	0.0158834	0.0147606	0.0109904	0.0412663	0.025579	0.00022443	0.0189107	0.0395219	-0.00229599	0.00188395	0.018971	0.0220675	0.03824	0.0177863	0.0136451	0.0027853
-47	0.0581485	0.0591051	0.0475248	0.0569118	0.0965563	0.0323689	0.0607231	0.078513	0.0667449	0.0587127	0.158748	0.0557704	0.0359462	0.047284	0.0652184	0.0313635	0.00869868		0.0888855	0.0195057	0.0410266	0.0124856	0.0542481	0.0324507	0.0365463	0.0556141	0.0228867	0.0197849	0.042695	0.0530483	0.0558974	0.0368344	0.0582294	0.0761018	0.0411888	0.0591101	0.0435152	0.0286668	0.0217802	0.038765	0.0607111	0.0459946	0.0701381	0.0446444	0.018859	0.00384958
-42	0.140011	0.152651	0.105935	0.152714	0.161909	0.0991421	0.0895291	0.144225	0.137714	0.140668	0.283303	0.15642	0.115282	0.120379	0.142849	0.0463184	0.0128464		0.10253	0.0524996	0.0394145	0.0514848	0.081717	0.0770886	0.0768069	0.14424	0.0800975	0.0540179	0.0904312	0.123242	0.115121	0.108399	0.125621	0.1193	0.121217	0.13944	0.0990724	0.103825	0.0758386	0.0942531	0.138485	0.112687	0.131681	0.0983404	0.0298094	0.00608483
-37	0.281111	0.305749	0.21231	0.260168	0.292611	0.215146	0.165146	0.270854	0.253219	0.237649	0.414892	0.300536	0.223277	0.222547	0.261087	0.0594321	0.0164835		0.200871	0.120339	0.0896793	0.108022	0.153325	0.160284	0.162478	0.282221	0.130068	0.15992	0.211724	0.253344	0.252911	0.221638	0.23723	0.230262	0.228242	0.281512	0.194664	0.154068	0.173986	0.202472	0.250253	0.241598	0.25613	0.19829	0.0545997	0.0111451
-32	0.439825	0.431745	0.36732	0.405092	0.468187	0.342853	0.277677	0.447085	0.439573	0.395041	0.583109	0.4579	0.371659	0.362688	0.413554	0.0717251	0.019893		0.336995	0.261529	0.170195	0.22054	0.275787	0.266543	0.247508	0.458618	0.26259	0.304047	0.295782	0.412028	0.422014	0.365603	0.39435	0.374852	0.323304	0.440244	0.332261	0.307129	0.334193	0.358314	0.426091	0.394621	0.437847	0.336919	0.0760928	0.0155324
-27	0.620045	0.593242	0.517179	0.572141	0.636618	0.487376	0.432649	0.615365	0.614834	0.574879	0.700548	0.639986	0.559352	0.564664	0.580634	0.0682533	0.0189301		0.526539	0.36132	0.302815	0.383073	0.439606	0.443973	0.387714	0.633556	0.426684	0.491541	0.484861	0.578052	0.579748	0.515766	0.576868	0.537577	0.468981	0.61913	0.461824	0.484964	0.515627	0.526132	0.611758	0.551953	0.596762	0.500273	0.0860556	0.017566
-22	0.76515	0.757402	0.687835	0.717296	0.793143	0.644349	0.615784	0.768347	0.72663	0.70718	0.836353	0.780727	0.706333	0.687304	0.728131	0.059817	0.0165903		0.696881	0.580938	0.444661	0.549166	0.612929	0.607697	0.558915	0.784135	0.594535	0.674905	0.640785	0.729895	0.74199	0.67603	0.725166	0.666246	0.633958	0.76304	0.636793	0.571353	0.663137	0.687092	0.692988	0.728706	0.748662	0.656424	0.0794928	0.0162264
-17	0.885622	0.856735	0.80683	0.847964	0.849446	0.782352	0.754169	0.890059	0.835818	0.835423	0.897682	0.861371	0.806796	0.801879	0.836582	0.0420851	0.0116723		0.782799	0.715381	0.600354	0.716798	0.768687	0.724823	0.713582	0.873046	0.74092	0.81594	0.798829	0.84565	0.850487	0.789016	0.845882	0.864682	0.742857	0.88896	0.772215	0.769733	0.808125	0.824451	0.860591	0.839529	0.850141	0.792139	0.0671428	0.0137055
-12	0.949004	0.917901	0.89185	0.892887	0.893529	0.901142	0.844223	0.939267	0.907706	0.908788	0.926504	0.949692	0.924186	0.908277	0.911068	0.0274307	0.00760791		0.871779	0.862472	0.690223	0.866847	0.879945	0.853866	0.823326	0.945398	0.916341	0.913078	0.879792	0.918966	0.913367	0.867013	0.936542	0.908883	0.86656	0.946363	0.838095	0.867594	0.910073	0.909826	0.899577	0.914023	0.909294	0.88437	0.051717	0.0105567
-7	1	0.990565	0.960049	0.962107	0.91087	0.973196	0.952766	0.97684	0.880236	0.946809	0.990402	1	0.964629	0.967375	0.96256	0.0334055	0.00926503		0.947445	0.911923	0.834079	0.933451	0.939569	0.942204	0.893688	0.986619	0.960127	0.969995	0.919957	0.972652	0.985687	0.924211	0.982707	1	0.957457	1	0.912183	0.933954	0.922027	0.946358	0.929159	0.932619	0.979275	0.944694	0.0371957	0.00759253
-2	0.992505	1	0.996382	1	1	1	0.981387	1	0.924275	1	0.958968	0.971213	0.949538	0.959387	0.980975	0.0244808	0.00678975		1	1	0.898008	0.980997	0.98377	0.991165	0.947814	1	0.975952	0.998442	1	0.998855	0.9969	1	0.989914	0.994288	0.981721	0.997164	1	0.943429	0.982712	0.971121	0.887015	1	1	0.980771	0.030789	0.00628478
3	0.959389	0.979402	1	0.999816	0.85443	0.996605	1	0.962487	1	0.950025	1	0.934199	1	1	0.974025	0.0411979	0.0114262		0.913695	0.981528	1	1	1	1	1	0.990587	1	1	0.970693	1	1	0.967559	1	0.954331	1	0.962312	0.942286	1	1	1	1	0.946427	0.955664	0.983403	0.0246443	0.00503049
8	0.986361	0.981708	0.998866	1.04549	0.875395	1.02295	1.02673	0.979629	0.891592	0.970236	0.956297	0.973576	0.942639	1.00558	0.975503	0.0479907	0.0133102		0.974465	0.937401	0.917013	1.01316	1.01906	1.0055	0.867715	0.99491	1.02034	0.987824	1.01425	0.972254	1.04418	0.97888	1.01154	0.962597	1.0458	0.984058	0.921512	0.882296	0.998863	0.972096	0.873209	0.956905	0.981653	0.973499	0.0495278	0.0101098
13	0.917557	1.00047	1.01149	0.944337	0.867391	1.00449	1.09777	0.966294	0.933846	0.96598	0.887324	0.898745	0.936006	0.950377	0.955863	0.0595456	0.016515		0.891907	0.998522	1.00843	1.01996	1.05238	0.991288	1.07428	1.00779	0.992105	0.970207	0.938181	0.982827	0.974904	0.985098	0.960654	0.940409	0.982163	0.9131	0.999451	0.995904	0.989543	0.950104	0.763915	0.886494	0.911149	0.96723	0.0618211	0.0126192
18	0.851547	0.983608	0.982476	0.945486	0.735597	0.92032	1.0106	0.920268	0.889255	0.949293	0.941914	0.934879	0.992775	1.0142	0.93373	0.0731348	0.0202839		0.906744	0.982925	0.987563	1.00895	0.990704	0.931275	0.910507	0.971957	0.955096	0.980183	0.96009	0.948158	0.984506	0.955935	0.927007	1.06555	1.01853	0.850839	0.947142	0.949211	0.9797	1.00605	0.950137	0.915754	0.956718	0.961649	0.0430242	0.00878228
23	1.10848	0.969367	1.01012	1.09306	0.972026	1.08253	0.967707	1.00424	1.10497	0.954185	1.13215	0.974424	1.00487	1.00978	1.02771	0.0624693	0.0173259		0.955597	0.952374	0.966762	0.994467	1.00174	1.05826	0.983931	1.00309	1.04821	1.02304	1.01125	1.04689	1.04677	0.976062	1.16176	0.873353	1.01335	1.11634	0.89874	0.988866	1.02423	1.00207	1.08189	0.994691	0.981531	1.00821	0.0609843	0.0124484
28	1.45495	1.13954	1.24024	0.822859	0.781303	1.55183	1.38541	1.00997	2.18597	1.21759	10.8607	2.48002	1.18202	0.988686	2.02151	2.58872	0.717982		1.07951	0.864555	2.89281	1.1101	0.914884	1.0204	1.79683	5.40675	0.930214	1.36128	1.03471	1.39059	1.17192	1.433	-0.289168	0.871208	1.11338	1.43375	1.61489	0.749059	1.55372	1.15589	1.35349	0.872187	1.1715	1.3603	0.995084	0.203121
33	0.091414	2.81408	1.897	10.294	-1.79426	0.372314	2.36579	1.67078	-0.273076	-5.59073	0.291816	0.106351	-6.99734	33.9791	2.80195	9.82265	2.72431		0.783147	1.79796	-1.71563	1.49029	0.812352	1.0238	1.65882	0.44878	1.2038	8.21885	1.66743	-0.286341	-6.22495	-0.0460921	0.455911	0.881506	-26.3413	0.0975265	-0.780965	-4.71439	-0.430897	-2.37024	-4.79377	1.30594	2.41886	-0.937583	5.97335	1.2193
38	0.455253	-0.0834799	-0.899848	0.0404411	0.72436	0.387584	-0.350621	-1.39638	0.473365	0.40893	0.463399	0.422429	0.00981786	0.133652	0.0563499	0.590392	0.163745		12.8221	0.0433724	-0.322193	4.68226	1.13509	13.4785	-0.0750105	0.533739	-1.52147	-0.0141671	-1.23535	0.223665	0.0773852	0.451649	0.450636	-0.811659	0.265488	0.446185	0.508524	0.806443	0.206904	0.0868959	-0.373004	-1.61155	-1.80034	1.13817	3.81592	0.778921
43	0.44881	0.29509	-0.10367	0.378072	0.553988	0.360225	0.31677	-0.0701594	0.467765	0.40006	0.391456	0.387862	0.253974	0.412632	0.32092	0.18802	0.0521473		0.928174	0.350164	-0.0270187	-0.464992	1.00092	-0.623234	0.175805	0.509936	0.234581	0.343066	-0.212273	0.364242	0.399365	0.373546	0.490512	0.515733	0.565534	0.454157	0.346314	0.592178	0.288204	0.222072	0.489919	0.226606	-0.381314	0.286488	0.384724	0.0785314
48	0.455623	0.346758	0.219497	0.501305	0.651996	0.516499	0.493244	0.182784	0.278624	0.427922	0.393755	0.344518	0.283232	0.463446	0.397086	0.129465	0.035907		0.672355	0.537022	0.146259	0.0699539	1.1069	0.250284	0.403641	0.438249	0.423044	0.289906	0.191921	0.438738	0.298608	0.400225	0.458151	0.421766	0.372689	0.461815	0.352354	0.654561	0.361187	0.276948	0.391276	0.316649	0.0999499	0.393378	0.208735	0.0426079
53	0.363074	0.273146	0.286308	0.401602	0.59551	0.43667	0.429074	0.20585	0.399785	0.467611	0.407963	0.36537	0.265423	0.386498	0.37742	0.0982468	0.0272488		0.791827	0.540057	0.0685176	0.194783	0.8796	0.333509	0.585084	0.4174	0.436642	0.340711	0.18805	0.409117	0.393743	0.416203	0.499783	0.375949	0.444706	0.367422	0.37396	0.698307	0.359426	0.307822	0.447785	0.258457	0.235568	0.414577	0.182773	0.0373085
58	0.472519	0.332352	0.25992	0.452001	0.547794	0.483695	0.411869	0.253649	0.423618	0.421556	0.379792	0.357595	0.26688	0.383243	0.389034	0.0886291	0.0245813		0.726839	0.494919	0.186339	0.27185	0.812788	0.369831	0.434692	0.390818	0.47335	0.348297	0.307661	0.349301	0.390289	0.389113	0.42719	0.448173	0.509385	0.469354	0.374447	0.641163	0.345788	0.308036	0.377598	0.313566	0.230942	0.415669	0.142934	0.0291762
63	0.576394	0.347969	0.281338	0.489225	0.525439	0.467108	0.450642	0.21838	0.33204	0.394798	0.356068	0.342722	0.288725	0.435927	0.393341	0.101739	0.0282174		0.600426	0.500614	0.177791	0.254803	0.775664	0.402739	0.500337	0.37109	0.381929	0.301779	0.326609	0.371574	0.37301	0.358093	0.455086	0.391487	0.424732	0.573172	0.346733	0.623482	0.317436	0.317512	0.414362	0.285888	0.318605	0.406598	0.130753	0.0266899

## Sheet: Figure 5E
Whole cell, Vhalf (mV)
WT	KO
-30.3712	-27.8555
-29.9411	-23.5581
-27.325	-18.9805
-28.862	-23.1757
-32.1669	-24.8831
-26.1813	-24.3659
-24.6518	-20.9949
-30.4204	-30.586
-30.5273	-24.4709
-29.0567	-26.4769
-34.4248	-26.3661
-31.1937	-28.9945
-28.3791	-29.168
-28.0446	-27.541
	-28.7397
	-27.9697
	-25.5072
	-30.3196
	-26.36
	-25.3203
	-27.0668
	-27.6885
	-30.2002
	-29.0769
	-29.8846

## Sheet: Figure 5F
Whole cell, k (mV)
WT	KO
6.34576	6.47118
7.08745	6.74276
7.18794	6.16408
7.34978	7.1178
6.18156	6.90779
7.49124	6.78617
7.51053	7.24153
6.5545	6.80249
6.65813	7.16345
6.91652	8.11904
7.4781	6.38058
6.32676	7.37708
6.6831	7.57893
7.06131	6.46085
	6.64262
	6.66505
	6.60798
	6.84712

## Sheet: FIgure 5H
WT
	Depolarization duration (s)	Oct0523a	Oct0523b	Oct1023a	Oct1023b	Nov2323b	Dec1223c	Feb0224a	Feb0224b	Feb0224c		Average	n	SD	SEM
Capacitance change (fF)	0.002	-0.140578	0.8551	0.809981	1.76321	1.17398	0.458309	0.640014	0.612569	2.11574		0.920925	9	0.683054	0.227685
	0.005	3.73889	1.63379	0.50653	4.77626	1.24138	2.55279	1.30819	1.27773	4.23896		2.36384	9	1.53292	0.510974
	0.01	5.18672	1.94418	2.35427	8.4047	3.55151	4.71717	2.42812	3.39371	8.59837		4.50875	9	2.50285	0.834282
	0.02	12.8781	4.77398	6.00543	15.5459	7.83842	7.90926	5.11314	8.30032	15.2005		9.28501	9	4.19176	1.39725
	0.051	20.0404	8.76703	15.2112	30.1059	13.7873	12.4542	12.3033	20.0678	23.2269		17.3293	9	6.63555	2.21185
	0.1	43.1586	15.35	20.978	35.2824	21.2869	17.2596	15.8222	40.653	35.9257		27.3018	9	11.2882	3.76275
Qca (pC)	0.002	0.255877	0.203504	0.164528	0.270492	0.310435	0.196058	0.206509	0.292528	0.251672		0.239067	9	0.0488762	0.0162921
	0.005	0.367703	0.344253	0.689443	0.745698	0.675099	0.525321	0.62453	0.848107	0.764559		0.620524	9	0.175093	0.0583644
	0.01	1.32235	1.13081	1.48605	1.38513	1.40945	0.998582	1.44141	1.75185	1.6051		1.3923	9	0.227593	0.0758645
	0.02	2.70097	2.19646	3.14133	2.73404	2.84136	2.21603	2.72987	3.53135	3.2085		2.8111	9	0.439205	0.146402
	0.051	6.32438	5.53432	6.74029	6.7403	6.92897	5.18414	6.5896	8.3301	7.83575		6.68976	9	0.988168	0.329389
	0.1	12.8755	10.3449	14.0832	13.2781	13.1003	10.5378	12.9816	16.7988	15.4391		13.271	9	2.06481	0.68827
KO
	Depolarization duration (s)	Oct0923c	Oct0923d	Oct0923f	Oct0923g	Oct1323a	Oct1323b	Nov2223d	Nov2223c	Nov2223a		Average	n	SD	SEM
Capacitance change (fF)	0.002	0.844267	0.298606	-0.81702	1.29263	0.394741	2.28236	0.117959	1.03633	-0.0740085		0.597318	9	0.893562	0.297854
	0.005	1.24605	0.125608	3.30662	4.54637	0.687335	6.45115	1.28199	2.16541	1.15189		2.32916	9	2.06446	0.688153
	0.01	3.97397	3.03423	6.16376	4.34618	4.67894	9.21143	2.64384	3.34329	3.75411		4.57219	9	2.02297	0.674324
	0.02	8.18055	6.1254	11.8695	12.1906	8.59879	13.07	4.89382	5.47825	6.86481		8.58575	9	3.08935	1.02978
	0.051	18.757	25.3537	20.4433	19.5683	15.9123	19.6917	8.5298	10.536	10.7347		16.6141	9	5.6035	1.86783
	0.1	42.1614	48.2587	27.0494	19.7456	27.4998	27.5129	13.5545	15.7398	16.1932		26.4128	9	12.0219	4.00728
Qca (pC)	0.002	0.32152	0.284071	0.301342	0.342798	0.200342	0.299939	0.20693	0.193674	0.218451		0.26323	9	0.0580205	0.0193402
	0.005	0.911379	0.721408	0.843624	0.92823	0.684482	0.869068	0.623719	0.573188	0.607828		0.751436	9	0.138413	0.0461377
	0.01	1.89037	1.4358	1.70371	1.55987	1.35064	1.63196	1.23566	1.22619	1.24175		1.47511	9	0.236452	0.0788174
	0.02	3.60656	2.78196	3.45442	3.37068	2.72104	3.44998	2.7041	2.38402	2.50177		2.99717	9	0.468349	0.156116
	0.051	8.58745	6.57276	8.37854	8.44655	6.73722	8.21445	6.50272	5.92955	5.92085		7.25445	9	1.12995	0.376651
	0.1	15.6754	12.8808	15.9985	17.313	12.0806	15.3647	12.603	11.7054	11.3669		13.8876	9	2.19694	0.732313
