# Supplementary material for: Probing the role of synaptic adhesion molecule RTN4RL2 in setting up cochlear connectivity
Source: eLife. 2025 Oct 20;14:RP103481. doi: 10.7554/eLife.103481 (PMC12537009; doi:10.7554/eLife.103481)
Supplement: Figure 6—source data 1. [file elife-103481-fig6-data1.xlsx]

## Sheet: Figure 6B
Fluorescence-Voltage relationships of individual hotspots
WT
Voltage (V)	FV_1	FV_2	FV_3	FV_4	FV_5	FV_6	FV_7	FV_8	FV_9	FV_10	FV_11	FV_12	FV_13	FV_14	FV_15	FV_16	FV_17	FV_18	FV_19	FV_20	FV_21	FV_22	FV_23	FV_24	FV_25	FV_26	FV_27	FV_28	FV_29	FV_30	FV_31	FV_32	FV_33	FV_34	FV_35	FV_36	FV_37	FV_38	FV_39	FV_40	FV_41	FV_42	FV_43	FV_44	FV_45	FV_46	FV_47	FV_48	FV_49
-0.0874647	-0.288163	-0.00538754	-0.0132832	0.212836	-0.0382398	-0.0767936	0.23106	-0.302815	-0.437345	-0.503358	-0.11429	-0.186925	-0.210499	0.0569345	-0.19833	-0.0396294	0.184441	-0.260905	-0.00217369	0.11974	-0.500592	0.0873429	0.0837598	0.363578	0.247848	-0.127319	-0.0786371	-0.154356	-0.620602	-1.6508	-0.0220737	0.215759	0.146751	-0.0173343	-0.125427	0.123618	0.316998	-0.05252	-0.0195085	0.0118051	-0.150525	-0.118568	-0.0878382	-0.0421905	-0.05803	-0.151479	-0.23854	0.353561	0.0651319
-0.0874067	-0.276455	0.30425	0.24153	-0.0588139	-0.0221736	0.313348	0.114934	-0.0311866	0.398683	-0.453637	0.319867	0.173247	0.0605564	-0.443368	0.0846993	-0.452018	0.445386	-0.204098	-0.048418	-0.257462	-0.303716	0.268713	0.104918	0.0776598	-0.367029	-0.168316	-0.2648	-0.0156036	0.270952	0.315676	0.0190495	-0.097846	-0.001497	-0.113274	-0.431741	0.458515	-0.11999	0.0820086	-0.0291701	0.00739501	0.22647	-0.160135	0.107417	-0.044537	0.00419015	0.0507266	-0.156294	0.041089	0.143255
-0.0873936	0.238953	0.000184642	-0.161006	0.256468	0.135018	-0.0351909	0.311326	0.101527	-0.246815	0.103936	-0.412405	-0.573038	-0.0509302	0.123431	0.432826	0.232328	-0.235786	0.0971685	-0.815448	-0.170954	0.206888	-0.304763	0.147184	0.280251	-0.0962943	0.126797	-0.344594	-0.183672	0.356561	0.108213	0.0295887	0.166307	-0.0368153	-0.113721	0.0171626	0.191263	0.00318055	-0.0318022	-0.445967	0.00323546	0.014967	-0.209307	0.0901939	0.129727	0.0420641	0.100319	0.0238368	0.086567	0.076068
-0.0873638	-0.176248	0.0665075	0.0917233	0.1432	-0.00157469	-0.104863	-0.0152546	-0.513427	-0.420784	0.726357	-0.158384	0.0375968	-0.589725	-0.245097	0.878899	0.223861	0.44719	-0.237724	0.359739	-0.517693	-0.10647	-0.314735	0.0125723	-0.164482	0.261944	-0.148729	-0.191012	-0.132353	-0.376005	0.0414715	0.124699	0.0582331	0.128467	-0.285435	0.0750973	-0.289935	-0.0229959	-0.164271	0.194774	0.0230667	-0.103333	0.0754357	0.0741349	-0.0998321	-0.0298452	0.0241715	0.173482	-0.0503674	0.0434206
-0.0873626	0.421149	-0.176343	-0.187955	-0.0669686	-0.101642	0.0384729	0.0268526	0.047001	-0.370822	-0.326519	0.192414	-0.149911	0.0335725	-0.140671	-0.0190771	-0.0438699	0.0366208	0.239986	-0.418271	-0.00171967	0.161814	-0.0021255	0.238866	-0.360538	0.325616	-0.20741	0.0641826	-0.396913	0.0429945	-0.719423	0.19994	-0.0998076	-0.156859	-0.0385264	0.149814	0.324931	-0.00135158	-0.137963	0.107033	-0.079177	0.0286906	-0.116508	0.233557	-0.156652	0.182298	0.00416464	0.062366	0.216643	0.0317176
-0.0873482	-0.234255	-0.347532	0.237027	0.0607266	-0.00299312	0.252148	0.0667988	-0.26858	0.0818333	-0.340912	-0.0530976	-0.107326	-0.371289	0.120401	-0.0460038	0.0842356	-0.483256	0.338774	-0.654382	0.218206	-0.00022577	0.258179	-0.21306	0.203735	0.104964	-0.0928933	-0.147247	-0.321394	0.389941	0.563352	-0.000814762	0.110447	0.163537	0.0807419	0.184271	-0.223561	0.130064	-0.0111719	0.193473	-0.170812	-0.18417	-0.0165019	0.267699	0.0951181	0.0649063	-0.0366415	0.0201368	-0.201893	-0.0618695
-0.0873464	-0.149497	0.151529	-0.000147894	0.0693052	-0.00109835	0.0490119	-0.21195	-0.046918	-0.124223	-0.311786	-0.275145	-0.239134	-0.0887264	0.544292	-0.0686348	-0.726944	-0.20531	0.0279178	0.0117294	0.274035	-0.485401	0.16742	-0.111873	-0.0229085	-0.10148	0.277082	0.104717	-0.203444	-0.470015	0.797566	-0.0472663	-0.0406587	-0.0854703	0.0981735	0.185052	0.205277	-0.0776794	0.128386	-0.182444	-0.0667793	-0.021033	-0.0648395	0.15878	-0.180988	0.12685	0.0355423	0.114836	0.129716	0.0173283
-0.0873115	0.0570673	-0.0929957	-0.325292	0.0247355	-0.0483044	-0.0386301	0.161363	0.216528	0.21606	0.379864	0.110633	-0.0891385	0.299391	-0.0179941	-0.297768	0.569635	-0.605807	-0.0176012	0.0166995	0.0135663	0.0431002	0.121039	-0.231109	0.0659344	0.00628777	-0.187784	0.192348	-0.485351	-0.407268	0.790699	0.0500759	0.0300715	0.0444045	0.310668	-0.12494	0.0584767	0.144384	-0.256906	-0.321811	-0.0124033	0.256448	-0.146649	-0.0669021	-0.273039	0.0291701	0.103621	0.203405	0.323066	0.315521
-0.0872975	-0.014135	-0.0946667	0.289089	-0.027326	-0.0511093	0.181874	0.0246893	0.108311	0.168347	-0.355359	-0.0203665	0.136551	-0.0877703	-0.00835166	-0.0395145	0.860691	0.507604	-0.342802	0.375289	-0.534247	0.207541	0.179712	-0.0351613	0.113001	0.0907389	-0.330081	-0.0218217	0.215312	-0.254907	-0.397582	-0.0324191	0.128583	0.120134	-0.114751	-0.159221	-0.156197	-0.0341038	0.264304	0.131289	0.406798	-0.0993599	-0.107799	-0.238402	-0.322807	-0.0299693	0.109481	0.0363432	-0.295417	-0.0597034
-0.0872882	-0.432599	-0.198268	-0.129015	0.0455408	0.0892074	-0.202979	-0.0146682	0.337216	0.0752358	0.511432	0.264312	-0.159733	-0.0162002	-0.757856	0.0525831	-0.388831	0.810042	-0.0213429	0.476969	0.768206	-0.210894	-0.212833	-0.446884	-0.200357	0.217477	0.0543837	0.105242	0.02236	0.35194	0.363004	-0.0209183	-0.0670035	-0.100528	-0.0342454	-0.254609	0.134834	-0.193749	0.43018	-0.201856	-0.0202172	-0.128373	0.124313	-0.315066	0.0775091	0.123264	-0.0701578	0.020561	0.0368895	-0.310524
-0.0872857	0.252372	-0.00543948	-0.229236	-0.0442198	0.0786154	-0.0671835	0.0145967	-0.198275	-0.177906	0.942378	-0.423709	0.134576	-0.119594	-0.0130457	-0.339021	-0.907933	-0.163155	-0.278112	0.115168	0.346746	0.273161	0.213633	-0.00219123	0.215693	0.266179	-0.0200074	-0.174234	0.195593	1.24318	0.671035	-0.224052	0.00960003	-0.0844906	-0.0676958	-0.0175156	-0.110926	0.0225448	-0.389627	0.218804	0.143769	0.238723	0.0534537	-0.0945344	-0.0651433	0.0190309	-0.144657	0.0245489	-0.0402421	-0.227188
-0.0872751	-0.14847	0.247775	-0.315018	-0.117063	-0.066524	-0.0142763	-0.418084	0.0682624	-0.283812	0.583005	0.141929	-0.140437	0.186023	-0.258523	-0.446648	-0.465959	-0.362872	-0.433973	-0.278264	-0.0117452	-0.375687	0.00682819	-0.195576	-0.00526911	-0.0991732	-0.0804405	0.0351139	0.106137	0.0625093	0.124153	-0.0984368	-0.0149311	-0.243819	0.0241592	0.162398	0.205405	0.254404	0.269446	-0.181649	-0.0446556	0.151866	0.0959253	0.109325	-0.125635	0.11177	-0.0751057	-0.0482525	-0.0687343	-0.0645535
-0.0872716	0.0487808	0.307306	-0.0568832	-0.0836316	-0.0117112	0.138187	-0.0901275	-0.000587261	0.0100456	0.302864	0.153899	0.273277	-0.00823909	0.275216	0.27307	-0.21805	0.211262	0.103025	-0.157185	0.271098	0.0147898	0.691563	-0.430101	-0.152816	0.109522	0.0695979	0.11927	-0.412822	0.176682	-0.0008697	0.0708854	-0.266498	0.109887	0.00879577	0.193683	0.154296	0.226747	0.0517829	0.281844	0.0825368	0.124514	0.0330288	0.0457317	-0.159501	0.171367	0.107672	0.0538911	0.26655	-0.194231
-0.087267	0.0340117	0.173197	-0.281903	0.123716	0.0896665	0.195374	0.450212	0.177965	-0.058164	-0.190001	0.28365	-0.134419	-0.260066	-0.41723	-0.354432	-0.417493	0.405153	0.396399	0.328906	-0.129759	-0.175799	-0.0954085	0.131804	0.0193023	-0.112857	0.204095	-0.222177	0.0711421	-0.27039	-0.64646	-0.0599969	-0.00193161	0.226023	-0.109563	0.0526543	-0.263204	0.234147	-0.16357	0.112835	0.0128421	0.087346	-0.0562774	0.197936	0.137579	0.0867854	0.0866337	0.25211	-0.104841	-0.0738555
-0.0872598	0.0556483	-0.353235	0.199083	0.0069496	-0.111785	-0.270933	-0.025982	0.0878893	0.214683	0.0896108	-0.350783	-0.160162	0.0750589	0.179701	-0.000219936	-0.287605	-0.123655	0.298247	0.451832	0.718309	0.0526951	0.218342	0.0330452	0.290576	-0.261949	0.026274	-0.00881199	0.087562	-0.0364338	-0.230277	0.0867825	-0.112594	-0.0271308	0.106472	-0.433725	-0.562234	-0.546365	-0.261813	-0.0813452	-0.216476	0.0254946	-0.0578238	0.230213	-0.0671268	0.006097	0.0254908	-0.0627678	-0.0483646	0.201267
-0.0872525	0.432757	0.192026	-0.123961	-0.100683	0.00753099	0.372815	-0.470313	0.254461	-0.485634	-0.0910299	-0.25069	0.170043	0.217437	-0.815627	0.150585	0.176024	-0.650316	0.395887	0.0270075	-0.79193	0.18785	-0.0682241	-0.0266377	-0.284265	0.313158	0.112211	0.398848	0.220267	0.490504	-0.0928404	0.0674682	-0.409891	-0.147041	0.00274017	0.0404505	-0.0619822	-0.00837671	-0.145791	-0.185191	0.192388	0.150361	0.0531779	-0.087674	0.194116	-0.0492371	0.135658	-0.0132254	-0.44055	-0.190817
-0.0872401	-0.486503	0.253877	0.0340434	-0.0654841	0.0473918	-0.184985	0.00893305	-0.257687	0.363827	0.166346	0.0289573	0.476565	0.228059	-0.550535	-0.138111	-0.068261	-0.654095	-0.588986	-0.407272	0.0595343	0.0552164	-0.137232	-0.250039	-0.130648	0.101613	0.0128204	-0.205042	0.343433	-0.424126	-0.24316	0.109829	-0.190328	0.335167	0.355524	-0.0732427	0.522344	0.0318167	-0.237316	-0.0876536	0.159254	-0.0471255	-0.10948	-0.398445	0.111547	-0.0399863	0.192394	-0.0705339	0.142968	0.114344
-0.087232	-0.0266593	0.151228	0.406953	0.00650329	0.0713743	-0.123624	0.00922294	-0.0654912	0.226891	0.11108	0.151238	0.503245	-0.0522518	0.48963	0.0371	0.275494	-0.0212389	-0.167053	-0.380394	0.129868	-0.167743	-0.113571	0.194748	0.026194	-0.0127863	-0.0533583	-0.282725	0.0808844	-0.915148	-0.673951	-0.125505	-0.0310886	-0.356792	-0.0948193	0.122348	-0.0125821	-0.233457	0.0936828	0.136978	0.0823218	-0.0107002	0.219238	0.196553	-0.201689	-0.155341	0.090143	0.0901075	0.0387629	-0.271401
-0.0872309	0.0204709	-0.000276844	0.492288	-0.0238097	-0.0470149	-0.0399256	0.0186225	-0.166886	-0.155501	0.188857	-0.0129169	0.232848	-0.0999565	-0.523784	-0.200784	-0.563957	-0.146968	-0.130805	0.0711506	0.100504	-0.190025	-0.111193	0.123216	0.242847	-0.278859	-0.0428337	-0.168011	-0.314822	0.213918	-0.150356	0.0411679	0.0395811	-0.183666	-0.27137	-0.0565752	-0.0465359	0.218117	0.0944486	-0.327468	0.123869	0.302339	0.0845095	-0.00768548	-0.0695114	-0.109657	-0.117635	0.0926599	0.0983064	0.0431667
-0.08723	-0.340809	-0.0723389	0.45828	0.0231317	0.230682	-0.252608	-0.291477	0.418621	-0.147331	-0.114175	0.0724053	0.119714	-0.252793	-0.000680083	0.184609	0.401991	-0.422374	-0.525234	0.305615	-0.15793	0.417739	0.103281	-0.215958	-0.0740523	-0.397915	0.162197	0.243356	-0.0119822	-0.247616	-0.284895	0.166836	-0.190162	0.229187	-0.0446773	-0.279759	-0.182281	0.0356176	0.215031	-0.249253	-0.0502934	-0.0378057	0.351304	-0.285458	-0.257308	-0.078121	-0.189796	-0.0804382	-0.227137	0.123389
-0.0872231	0.663806	-0.121116	-0.0456466	-0.0235427	-0.144707	-0.22916	0.0739683	0.116123	0.20503	-0.129129	0.328615	-0.340037	-0.307591	-0.872427	-0.00908686	-0.0951516	0.120206	0.205221	1.1588	0.0710418	0.239796	0.269848	-0.129366	0.293454	-0.231058	-0.167922	-0.00580522	-0.063423	0.0758632	-0.14036	0.0311933	-0.252715	0.0986641	-0.00544836	0.151236	-0.148577	-0.0194319	-0.295464	-0.0861604	-0.149248	0.249796	0.0317793	0.0877787	-0.111469	-0.169861	0.000999906	-0.00875394	-0.0853079	-0.27143
-0.0872225	-0.00649694	0.0228081	-0.167735	-0.285255	0.00280019	0.031753	0.0256314	0.103236	-0.3096	-0.2446	-0.0288825	0.0697546	0.462201	0.0998218	-0.100078	0.137647	-0.370692	0.470681	-0.00165751	-0.00335277	-0.268835	0.0121622	0.572555	0.103747	0.069228	0.177637	-0.0800335	0.266184	-0.661434	0.494717	-0.324326	0.00766609	0.0180178	-0.224198	0.203275	0.350389	-0.171083	-0.215287	0.0392138	0.0735459	-0.0682413	0.026087	-0.0166145	0.186413	-0.359253	-0.152669	-0.0493662	-0.155326	-0.177721
-0.0872224	0.109612	0.105965	-0.140197	-0.0470458	0.0884159	-0.235498	0.137111	-0.0337346	0.382155	0.208371	-0.0412529	-0.0237869	0.168318	-0.617255	-0.448718	0.629449	-0.0874153	-0.302852	0.231619	0.404694	0.14528	-0.376115	-0.188297	-0.122077	-0.357143	0.00923107	0.0733122	0.265544	-0.311624	0.0250399	-0.0971655	0.179754	-0.185152	0.0973024	0.00539496	-0.0745009	-0.150811	0.139876	-0.173845	-0.120633	-0.104587	-0.152876	-0.0418017	0.209547	-0.0252871	0.0477705	0.147007	0.00383785	0.250646
-0.0872197	0.155354	-0.0197627	0.378088	-0.0944202	-0.0417665	-0.105693	-0.0538126	0.014851	0.0963806	0.101733	0.0021121	-0.33122	0.02469	1.22693	-0.21958	-0.388108	0.975934	-0.299529	-0.58156	0.0366052	-0.263635	-0.025563	0.107934	0.143218	-0.042967	0.129673	-0.0242942	-0.145387	-0.329588	0.0595293	0.13178	-0.130071	-0.183528	-0.0275348	0.428111	-0.109459	0.187582	-0.00598925	0.0474013	0.104258	-0.212154	-0.0561101	0.237661	0.359002	0.0184237	0.0284274	-0.0806351	0.0841284	0.160639
-0.0872148	0.135655	-0.113063	-0.385704	0.054946	-0.0637035	0.161747	0.004546	-0.209406	0.0555285	-0.0773753	0.151525	-0.03302	0.0182632	0.506495	-0.0473828	0.0375305	-0.291218	-0.0455519	0.315031	-0.13749	-0.0691703	0.179394	0.236267	-0.408883	-0.225543	0.0803675	0.162343	0.0156924	0.893674	-0.141658	-0.0327852	-0.117968	0.314564	-0.0362388	-0.187944	0.0900629	-0.0215753	-0.140531	0.547555	0.138299	-0.428409	0.0343971	-0.303007	-0.032947	-0.0465352	-0.079549	-0.0604577	0.0179896	0.0528511
-0.0872131	0.0642892	0.0411042	-0.0411956	0.0304092	-0.0411614	-0.0462881	-0.443954	-0.148858	0.0779314	-0.264114	-0.0138632	0.044106	0.177566	0.0784397	-0.0201356	0.448304	0.491647	0.0816225	0.567934	-0.299832	-0.468364	-0.232111	-0.0658154	-0.380218	0.386992	0.262179	0.0426317	-0.577619	0.491087	0.2035	0.0655791	0.262678	-0.0189609	-0.220326	0.0257994	0.132907	0.083298	-0.256906	0.0784769	-0.0982532	-0.160074	0.0285502	-0.153009	-0.130741	0.0377689	-0.0366497	0.18609	0.247435	-0.154471
-0.0872013	0.075853	-0.164868	-0.367479	-0.266983	-0.135044	-0.254504	-0.174931	0.0016786	0.140084	0.10425	-0.0731744	0.199302	0.199792	0.384259	0.0243395	0.692836	-0.470475	-0.0383482	0.149289	0.108165	-0.248031	0.118733	0.135275	-0.131133	0.160455	-0.00931151	-0.357175	0.338605	0.154418	0.299108	0.099556	-0.221201	-0.128778	0.13981	-0.114368	-0.0945369	0.061604	0.0318566	0.0417243	0.586137	-0.155432	0.0210159	0.213293	-0.236289	0.227479	0.104593	-0.065552	-0.123804	0.298447
-0.0871956	0.0331553	0.0703352	-0.00154364	-0.0622501	-0.0643084	-0.0407865	0.0032614	0.0921901	-0.211046	-0.425112	-0.00443314	-0.0335445	0.211286	-0.628994	-0.287917	-0.323437	-0.333888	0.154537	-0.276027	0.294087	0.283444	-0.0302392	-0.0228657	0.0102492	-0.270501	0.0974351	-0.268274	0.161042	0.0427571	-0.438488	-0.00598907	0.013331	-0.0434613	0.0509323	0.194646	-0.163607	0.00254989	0.126239	-0.0277372	0.0940977	0.255126	-0.272263	-0.0564597	0.314744	-0.138937	-0.234647	0.0843097	-0.25927	0.0556032
-0.0871838	0.194125	-0.160167	0.171263	0.0556285	0.0323621	0.346687	0.0878414	0.418728	-0.319503	-0.562524	0.213694	-0.041364	0.0433529	0.258689	0.0940192	0.558592	0.122665	-0.0268867	-0.673738	-0.140484	0.443936	0.0888776	-0.0563151	-0.276608	0.216192	-0.152681	0.0704268	0.281555	-0.0123168	0.665234	0.146527	0.0163861	0.1169	-0.354741	0.0130228	0.0634383	0.0724086	-0.0393226	0.0168613	-0.211924	0.0211966	0.183631	0.178518	-0.101642	0.00510347	-0.162349	-0.102199	-0.0508892	-0.27712
-0.0871616	-0.3222	-0.0293269	-0.145903	-0.0888482	-0.0131921	0.00209614	0.153956	0.220384	-0.246665	0.428429	0.11649	-0.585085	-0.0212844	-0.118563	0.286964	0.0825161	0.247367	0.161342	0.41393	-0.733919	0.20676	-0.369476	-0.0687566	0.177956	-0.130087	-0.15736	0.523422	-0.0102532	-0.188698	0.214858	-0.0207016	0.129305	-0.0759046	0.0949767	0.228663	-0.10723	0.0955303	0.124236	0.0630844	-0.0548175	-0.0131198	-0.0107077	0.0327269	0.418158	0.16886	0.159163	0.0582209	0.0401231	-0.0549309
-0.0871499	-0.186308	0.0252042	-0.394537	-0.036641	0.0473775	-0.108952	0.0301027	-0.36194	0.00644696	-0.093683	0.230329	-0.148359	0.28118	0.75055	0.0890586	-0.118211	-0.343375	0.0435068	0.0315054	-0.345	0.490428	-0.0106425	0.120796	-0.0202836	-0.153329	0.0814179	0.419149	0.083868	-0.389512	0.187241	0.0739339	0.327094	-0.18194	0.247873	-0.0853854	0.03957	0.0521811	-0.0630369	0.133806	-0.13251	-0.300691	-0.0870539	-0.188638	0.0605951	-0.00857347	0.0990886	-0.22635	-0.140059	-0.421859
-0.0871362	-0.118981	0.110806	-0.251027	0.0531459	0.0141798	-0.208525	0.203024	-0.250672	0.345794	0.119318	-0.15273	0.181493	-0.14993	-0.381127	-0.00611835	0.0303775	-0.138727	0.354974	-0.398065	-0.0109626	-0.290581	0.125869	0.25385	0.119404	-0.244415	-0.0322466	-0.219072	0.0350011	0.54167	0.213143	-0.232091	0.0643727	-0.174232	-0.0630247	0.242978	-0.0432282	0.00417077	-0.102996	-0.225742	0.231385	0.0501486	-0.0072383	-0.0806312	0.0890819	0.11324	-0.0445743	-0.0573339	0.1876	-0.0786765
-0.0871335	0.188199	0.00849368	0.468235	0.131346	0.0636503	0.158297	-0.0374792	0.433391	0.23833	-0.047525	-0.0821187	0.270334	0.00441839	0.859538	-0.0896282	0.203213	0.0941289	0.158284	-0.299599	0.539571	0.462162	0.0830901	0.265295	-0.0323162	-0.00778053	0.0798849	-0.05871	0.220782	-0.309244	0.0525086	-0.167658	0.0799213	-0.0979785	0.0125155	-0.0591232	-0.00967475	-0.107172	0.0941846	0.0580046	0.509291	0.254374	0.0967537	0.0348262	0.140469	-0.23499	-0.0738134	0.212972	0.0864853	-0.0947222
-0.087106	-0.156336	-0.0445766	-0.152547	0.0208107	-0.0354346	0.391192	0.0248235	0.107326	0.0168226	0.402548	0.205032	0.0332553	0.113631	0.0685958	-0.0345071	0.319632	0.139825	0.248189	0.698438	0.40063	-0.0412058	-0.473723	0.0580464	0.4224	0.166775	0.212019	0.261313	-0.0201781	0.00424919	-0.455804	-0.0355489	0.435064	-0.0362724	0.25329	0.172	-0.296759	0.0688054	0.368825	0.0534356	0.0889729	0.348814	0.13233	-0.117636	0.173641	-0.332651	0.0284274	0.0370361	-0.155582	0.307464
-0.0871037	0.555224	0.0862263	0.340815	-0.12028	-0.0675041	0.0841267	-0.0974951	-0.0715846	0.301582	0.0661544	-0.18483	-0.262068	0.0857816	1.4308	0.586557	-0.226053	-0.269508	-0.217313	0.331469	-0.755558	-0.0460855	-0.30582	0.165627	-0.314488	0.0342768	-0.270851	-0.454173	0.119015	0.116725	0.654811	-0.0742643	-0.14698	0.316386	-0.122014	-0.00532829	-0.0500526	0.00490022	0.32007	0.122072	-0.269628	-0.243722	0.435936	0.44633	-0.0416028	-0.114271	-0.317838	-0.0209482	-0.0200147	0.338741
-0.0871023	-0.417084	-0.138474	-0.0508951	0.122578	0.0534645	0.0361708	-0.0357962	-0.201269	0.340917	-0.295161	-0.07416	-0.235572	0.0201906	-0.689292	-0.0804792	0.162705	-0.034362	-0.145458	0.196357	-0.442252	0.334414	0.0472769	0.183788	0.205309	0.287091	-0.133483	0.163185	-0.191459	0.710142	0.194232	0.0466445	-0.0824391	0.0459605	-0.111306	-0.414854	-0.311174	0.0462111	-0.111937	0.199398	-0.333237	-0.110918	0.0564465	-0.196587	0.178695	0.331794	0.125946	-0.419037	-0.158262	-0.0322254
-0.0870813	0.204279	0.0762483	-0.147414	0.149322	0.0452452	0.0816805	-0.00937583	0.125314	0.169394	-0.171771	0.129385	0.0356587	-0.0947946	0.0702147	0.22474	0.296734	0.296706	-0.225779	-0.364368	0.153159	0.285203	-0.0647359	-0.334616	-0.133131	-0.0558198	-0.0815194	0.0413437	-0.271407	-0.143697	-0.614498	0.134633	0.208259	0.169575	0.453156	-0.0224239	-0.0124428	-0.159809	0.135162	-0.153096	-0.333243	0.0515787	0.0737562	0.0858561	-0.151282	-0.106714	-0.122219	0.0433568	0.00772961	0.230909
-0.0870774	0.338137	0.0255347	0.161625	0.0353427	-0.0437383	-0.135231	-0.0987223	0.00294049	0.103269	-0.0846002	-0.486499	0.125444	-0.294136	-0.37905	0.35719	-0.0478567	0.699473	0.203332	-0.557107	0.574462	-0.0859641	-0.239589	0.155017	0.259641	-0.347147	-0.166451	0.172737	0.053448	-0.438165	0.0282526	0.0388058	0.152705	0.243708	0.181694	-0.16135	0.0228926	-0.025728	0.130223	0.23421	-0.192587	-0.0858095	-0.31128	-0.301847	-0.129174	0.157165	0.0535558	0.00827817	0.142326	0.158798
-0.0870695	-0.151716	-0.00246541	0.191293	0.15977	0.162369	-0.00681744	0.385109	-0.252279	0.113049	-0.15663	0.142944	0.353677	-0.0873695	0.323629	0.120864	0.24839	-0.388502	0.129109	-0.0162552	0.34816	0.178775	-0.065984	-0.300092	-0.176824	-0.0344697	0.172694	0.209514	0.185039	-0.0236276	0.170339	-0.304893	0.0529877	-0.232776	-0.11512	0.047462	0.242712	-0.0893483	-0.212947	0.146891	-0.239864	0.0345541	-0.0709161	-0.0237106	0.0749983	0.107511	-0.189343	0.00335822	-0.0858665	-0.0106839
-0.0870695	0.030403	-0.253362	0.148623	-0.158763	-0.147299	-0.0476146	-0.0183384	0.0331589	-0.0526142	-0.197134	0.21523	0.146884	0.345285	0.32452	-0.215876	-0.407747	0.559426	0.236999	-0.0979056	-0.313728	-0.165294	0.12179	-0.179244	-0.0819795	0.200121	0.19536	0.160562	0.108127	-0.0272156	0.240498	0.00188271	-0.100177	0.171291	0.0117822	0.0844814	-0.213404	-0.322066	0.0559808	-0.0894247	-0.16127	-0.0191055	-0.19525	-0.0564499	0.110329	-0.10975	0.195659	-0.0496432	-0.0329768	0.366133
-0.0823702	-0.376388	-0.0269409	-0.194434	-0.0143846	0.0426794	-0.00391853	-0.0602251	-0.105509	-0.300557	-0.100396	-0.240927	0.256711	-0.0929073	-0.29262	-0.170053	-0.485073	0.007919	0.165154	-0.20639	-0.194368	-0.227272	0.190991	0.179396	-0.160874	0.262121	0.0876402	0.0136344	0.435848	0.227864	-0.596763	0.190049	-0.113813	-0.215532	0.0547575	0.0275317	0.223154	0.00783123	0.141247	-0.0898393	-0.117237	-0.188119	0.116515	0.0898685	-0.0601641	0.0618716	0.289477	-0.138586	0.193132	-0.366857
-0.0771511	0.736606	-0.235183	-0.0559058	0.0410538	0.0256727	-0.00679103	-0.38033	-0.167517	0.517661	-0.12432	0.0727934	-0.0360034	-0.0397227	0.165437	0.145543	-0.368182	1.07347	0.021052	-0.481071	0.173	0.0659547	0.229448	-0.150122	0.198608	0.468384	-0.0518855	0.0209086	-0.394088	0.324599	0.558836	-0.3068	-0.0453265	-0.0732926	-0.025766	0.0313683	0.126344	0.0135464	-0.0976911	-0.276669	-0.260827	-0.183923	0.0653868	0.0781033	0.178571	0.116367	-0.0572825	0.0399431	0.1524	0.047347
-0.0722067	-0.403953	0.206966	-0.405053	-0.0239461	0.184612	0.0333374	0.0360675	0.217577	-0.194698	0.00396098	-0.302557	0.116226	-0.0198569	-1.32369	-0.318137	-0.115324	-0.539991	-0.132256	0.0391699	0.283031	0.153066	-0.694306	-0.142975	0.0804446	0.0410722	-0.0166889	-0.206406	0.165324	-0.47111	-0.79933	-0.10917	-0.0515141	-0.129022	-0.0217414	-0.0363012	-0.205892	0.189302	0.105133	0.100652	0.429938	0.0950781	0.131237	-0.155726	-0.169697	0.164318	-0.0514884	-0.0833193	0.0579538	0.108022
-0.0671976	-0.281528	-0.353561	-0.10239	0.0960331	0.112701	-0.180745	-0.136004	-0.324307	-0.417454	-0.115415	0.545109	0.154533	0.0524598	-0.046316	-0.0332619	-0.665722	0.129821	0.178321	0.0456226	0.621164	0.380914	0.240761	0.0477201	0.0210398	0.294637	0.217367	-0.0744648	0.0370357	-0.305939	1.1223	-0.029429	-0.14736	-0.0714739	-0.144261	0.144941	0.430762	-0.0859251	-0.0538448	-0.0809187	0.150871	-0.0259988	0.448285	-0.0445231	-0.0597684	-0.091411	-0.0674999	0.0734918	-0.178343	0.0250312
-0.062086	-0.455514	0.246589	0.135178	0.0199337	-0.0354405	0.167977	0.179156	0.452768	0.0249386	0.762888	-0.0261489	0.208273	-0.00450757	-0.777559	-0.276911	-0.0705451	-1.01676	0.299981	-0.59778	0.115235	0.595308	0.0656805	-0.22814	-0.109499	-0.0910976	0.239516	-0.168011	0.438378	0.127604	-0.20393	0.0135	0.0347745	0.103303	0.148052	0.120955	0.247373	-0.185177	0.334045	0.0134828	0.623076	0.147088	-0.0513338	0.229295	0.0351445	-0.116636	-0.137077	-0.195915	0.13554	-0.0802533
-0.0569697	0.222699	-0.186028	0.067473	0.0773106	0.0579603	0.179229	0.105813	-0.187163	0.0659908	0.36252	0.188157	0.158157	-0.295357	0.17498	-0.195226	0.31355	0.132655	0.575701	0.187121	0.1994	-0.190343	0.309348	0.0197675	0.313045	-0.0115818	-0.00353069	0.237399	-0.0243497	0.16703	0.101878	0.167536	0.0146715	0.15774	0.23326	-0.0492975	0.252433	0.0702222	0.266304	-0.0856021	0.112758	-0.0663188	0.178136	0.117939	0.0192318	0.137266	0.00205627	-0.0823732	0.0689396	0.357142
-0.0520747	-0.344742	0.177693	0.00283601	0.0201649	0.0435485	0.0871461	0.211651	0.0939824	0.212488	0.108221	-0.00758592	-0.0164646	0.293126	-0.000990803	0.552457	0.157393	-0.278437	0.0867565	0.0559264	-0.402034	0.706773	0.203946	0.271626	0.248431	0.583155	0.0186341	0.259394	0.449636	0.28406	-0.000109702	0.135996	-0.116725	0.0895205	0.352307	-0.0155826	0.440637	0.262185	-0.0510195	-0.0637368	-0.117924	-0.0576262	-0.0638162	-0.0641242	0.294178	0.36289	0.0833991	0.104544	0.0707665	0.0267178
-0.0469448	0.888214	0.137342	0.32255	0.106285	0.0810801	0.228639	0.205942	0.38164	0.0852046	0.40495	0.411507	0.201055	0.75039	0.0967694	0.195241	0.570144	0.664256	0.126264	-0.412297	0.307496	0.720676	0.441171	0.405451	0.202518	0.893271	0.302792	-0.0632814	0.214683	0.236834	0.0205237	0.351341	0.254061	0.157361	0.317989	0.308528	0.297552	0.0291175	-0.189469	-0.0945225	-0.105487	-0.00133079	0.317355	0.162726	0.389182	0.0470663	0.0959261	-0.0593246	0.188663	0.222876
-0.0417589	0.327834	0.274964	0.111428	0.170952	0.114164	0.407767	0.230419	-0.196299	0.528629	-0.06272	0.537204	0.403574	0.518477	0.142489	0.326402	0.939267	0.862809	0.115697	0.606888	0.337088	2.00244	0.861067	1.08752	0.830831	0.691648	0.0748375	0.288169	0.379113	-0.0341169	0.393985	0.56114	0.201381	0.428383	0.977882	0.365953	0.0123006	0.19094	0.284567	0.00289912	-0.241639	0.694792	0.075314	0.0281306	0.0905531	0.373595	-0.0218239	0.0670998	0.158434	1.28125
-0.0365026	0.512192	0.439085	0.60715	0.252126	0.104389	0.975224	-0.0183821	0.541891	0.618389	1.15967	0.689813	0.766324	0.730226	0.00790971	1.45198	1.89243	2.00365	1.23668	-0.149371	1.0765	2.81148	1.14033	1.12117	1.44339	1.618	0.228283	1.4666	1.04378	0.809852	1.3725	0.588882	0.562514	0.432717	0.837368	0.664726	0.436826	0.149431	0.383628	0.549207	0.420049	0.206065	0.0715215	0.322986	0.454478	0.544007	0.176539	0.268991	0.196335	0.822476
-0.0313093	0.704183	0.699573	0.181482	0.745699	-0.0344185	1.52781	0.601427	1.58511	1.00637	0.354921	0.756121	0.0954357	1.14045	1.00171	1.62571	2.07803	0.852037	1.33414	1.90577	0.665533	2.6306	1.12769	1.74288	0.793708	1.89129	0.539656	0.554994	1.95562	3.04515	1.6254	0.598	0.537101	0.763687	0.534287	0.744711	0.750718	0.321551	0.833612	0.19566	0.538008	0.906262	0.409827	0.511982	1.34694	0.979994	0.457982	0.642904	0.379248	1.45163
-0.0258447	1.18846	1.14515	0.961987	0.694689	0.251907	2.17393	1.11534	1.75127	1.31028	1.14588	1.38354	1.21012	1.39695	4.21987	1.936	2.76402	1.99397	2.83225	3.04299	2.23941	3.26688	2.02672	2.16259	1.18946	1.89997	0.81728	2.00612	3.76235	2.71159	3.77072	0.933903	1.11415	0.995796	1.21389	0.791443	0.904131	0.603176	0.86018	0.488004	0.284028	0.360506	0.667382	0.70419	2.1359	1.21403	0.673602	0.980691	0.433599	1.4197
-0.0206846	0.629184	0.634776	1.17181	1.06096	0.197091	1.36978	1.04293	2.07844	1.93883	0.723083	1.08581	1.2857	1.26398	4.05568	0.943991	2.02559	4.35413	2.04694	3.1679	2.16008	2.82651	1.82272	2.17943	1.40999	1.3614	0.624127	1.66068	2.60486	3.91685	3.96519	0.787469	0.764768	0.826979	1.22386	0.596969	0.871348	0.767294	1.07847	0.707951	0.388807	0.954929	0.132645	0.671878	2.22246	1.52543	0.810055	1.59329	0.430662	2.09732
-0.0154078	1.03144	0.85943	1.74143	0.963165	0.380628	1.70023	0.884372	1.96291	1.14817	1.08231	1.4387	1.20872	1.27087	5.08723	1.17282	1.50778	4.94103	2.83186	3.4119	2.63353	2.96304	1.54079	2.09076	1.65853	1.58799	0.946531	2.32161	4.12871	2.8882	5.86831	0.947303	0.822807	0.890231	1.1941	1.14035	0.873195	0.521556	1.0229	0.485481	0.734189	0.302933	1.1224	0.817351	2.43258	1.38988	1.09934	0.873452	0.614051	1.44371
-0.0103994	0.578218	0.841394	1.8373	1.45422	0.208927	1.70022	1.32367	1.25869	2.27782	0.907043	1.39012	0.944124	1.70187	5.2387	1.06937	1.77286	4.4863	2.26648	3.54791	2.0255	2.79783	1.28748	1.7187	0.873973	1.46614	0.800958	2.34411	3.74751	3.57686	4.99242	0.895242	0.503718	1.13175	1.25534	0.788642	0.929593	1.02015	1.50767	0.716877	0.670847	0.884241	0.320525	0.700157	2.47458	1.17834	0.993544	1.33847	0.418554	1.34162
-0.00540404	0.944555	0.790143	2.31495	0.987688	0.45603	1.19397	0.972808	1.54043	1.98193	0.962824	1.35145	1.14274	1.96562	10.4479	1.36205	1.53827	4.83691	2.2837	4.54594	3.17647	2.3702	1.42298	1.93855	1.11953	1.43299	1.2526	2.10185	3.72214	4.13614	4.72626	0.794283	0.525661	0.901368	0.72998	1.02124	1.27298	0.867642	0.525193	0.508812	0.780364	0.372941	0.887534	0.502265	2.04168	0.798778	1.17947	0.897681	0.442821	0.898087
-0.000494183	0.540821	0.442241	1.71534	1.11993	0.23077	1.32506	0.956573	1.78924	1.44183	1.456	0.842663	1.22256	1.12734	5.68337	1.07354	1.62402	4.24837	1.84373	3.86597	2.63795	2.6313	1.1282	1.48366	1.29295	1.53835	0.790105	1.6031	3.47924	3.85392	3.41809	0.741245	0.821964	1.22057	0.620995	0.582964	1.31867	0.384483	1.01355	1.09314	0.867282	0.949121	0.311757	0.583736	2.35531	1.12088	1.28276	1.24346	0.38503	1.33799
0.0042914	0.998779	0.636351	2.45763	1.18365	0.208481	1.02429	0.983281	1.17371	0.609972	2.49925	0.612986	0.368378	0.824247	4.67089	1.13292	1.60631	4.23927	2.01958	2.86804	2.96692	2.33679	1.24772	1.16093	1.15853	0.829442	1.05295	2.57868	3.21727	3.43773	3.6617	0.509486	0.654479	0.837441	0.622923	0.550301	1.36776	0.820141	1.06163	0.511759	0.515075	0.255233	0.489166	0.729734	2.14848	1.02304	1.16823	0.894924	0.560267	0.628372
0.0090818	0.614655	0.765755	1.59671	0.907311	0.23248	0.769929	0.942027	0.70554	0.199889	1.45516	0.810895	0.909091	0.817089	4.68508	1.00473	1.16788	4.02026	1.46363	3.39823	1.18676	1.86519	1.04208	1.24894	0.810855	0.817359	0.396168	1.27373	2.49595	2.70533	2.50416	0.364835	0.441824	0.620767	0.260079	0.478885	1.14883	0.286777	0.784543	0.801463	1.05096	0.68093	0.207061	0.591313	2.11341	0.905942	0.667441	1.02791	0.385953	1.33921
0.0141155	0.706384	0.832347	1.8756	0.653122	0.275272	0.79597	0.776118	1.23031	1.05635	0.312431	0.719688	0.824194	0.80339	3.6097	1.03868	0.274026	3.52053	1.13948	2.55112	3.04198	2.27255	1.40054	0.91164	0.476592	0.835126	0.583173	1.62242	2.43529	2.18816	2.93826	0.378663	0.517402	0.557235	0.508124	0.653576	1.34471	0.478987	0.556473	0.103315	0.521385	0.17906	0.702395	0.246268	1.30566	0.846432	0.748871	0.680426	0.404307	1.32953
0.0188129	0.135659	0.557647	1.96301	0.953537	0.242572	0.606418	0.648736	0.620875	1.49289	0.32391	0.21658	0.278241	0.560295	2.20459	0.624811	1.0356	2.80277	1.06279	2.81025	0.795199	1.06564	0.709058	0.910666	0.799848	0.426412	0.187792	0.71846	2.24754	2.70071	1.4895	0.397055	0.292089	0.452933	0.394879	0.182323	1.26929	0.518046	0.927972	0.404178	0.656676	0.423192	0.284423	0.121575	0.932559	0.773183	0.590583	0.432798	0.541435	0.336289
0.0237122	0.525633	0.102772	1.08012	0.6738	0.24342	0.924781	0.368402	0.641308	0.90645	0.686144	0.60482	0.59979	0.431012	1.54467	0.506079	0.5891	1.83844	1.30523	1.76616	1.07515	2.56426	0.907959	0.593995	0.41316	0.471638	0.415644	0.931088	1.16107	0.811028	1.66691	0.58469	0.0804017	0.419065	0.246082	-0.362961	0.145691	0.680872	0.43751	-0.0319771	0.155778	0.442446	0.203389	0.283662	1.33763	0.377351	0.628132	0.459009	0.327289	0.835379
0.0285567	0.302984	0.337768	1.26247	0.229066	0.0112713	0.510109	0.136625	0.282419	0.531047	0.63861	0.172724	0.672887	0.734526	1.4505	0.294717	0.442875	1.78576	0.205678	0.898873	0.799976	0.516602	0.396489	0.728695	0.71661	0.181266	0.042875	0.495414	0.580812	1.00925	1.16439	0.272243	0.0653124	0.509958	0.387813	0.320492	0.744697	0.210267	0.384231	0.298832	0.857759	0.655665	0.237675	-0.0182146	0.889019	0.690469	0.292217	0.388635	0.245878	0.77845
0.0334502	0.438894	0.316408	1.89428	0.23962	0.222228	0.173649	0.531544	0.279231	0.218066	0.653296	0.278493	0.400304	-0.085421	1.31882	0.385956	0.142164	0.866357	0.614508	0.975808	0.735282	1.50814	-0.165402	0.683276	0.249706	0.371183	0.16193	0.525087	0.604017	1.73682	1.14053	0.387928	0.385036	0.415705	0.198541	0.270527	0.806703	0.481008	0.053728	-0.0205281	0.264895	0.388043	0.485821	0.439582	0.848434	0.615499	0.186463	0.457436	0.0429237	0.152827
0.0383055	-0.0482978	0.144396	1.24419	0.333697	-0.10743	0.311574	0.255782	0.39471	-0.0103184	0.391174	-0.0953803	0.117304	1.27047e-05	0.172336	0.19007	0.419206	0.663	0.945017	0.573499	0.0980385	-0.29238	0.0976435	0.933092	0.380467	0.244788	0.136983	-0.117366	0.678877	0.606175	0.575117	0.262896	-0.0405377	0.0423775	0.0959173	0.191745	-0.187721	0.271721	-0.244338	0.00528055	0.804392	-0.0525465	0.0628349	0.0117594	0.507465	0.0126617	0.291167	0.416938	0.0674944	0.423392
0.043345	0.587091	0.472691	1.24556	0.132894	0.0789579	0.106092	0.0711625	-0.0194128	0.537212	0.204085	0.0478368	0.0931211	0.165344	1.89239	-0.121572	0.0824473	-0.19037	0.767135	0.000314398	0.17082	1.42494	0.326511	0.37112	0.838651	-0.15433	0.314782	0.613598	0.393305	0.195967	0.94237	-0.00832828	0.291411	0.136122	-0.121182	0.204468	0.0662064	-0.115841	0.174992	-0.0288204	0.414458	0.0600729	0.519868	0.0546512	0.279002	-0.024656	0.254149	0.0698446	-0.0873314	0.291528
0.0482568	-0.147092	0.296484	0.706351	0.0715153	0.243287	0.22625	0.46258	0.0665183	0.434475	-0.542165	-0.326369	0.514931	0.520239	1.23866	0.125587	0.0745015	0.510128	0.0670713	0.58234	0.622762	-0.120293	0.052414	0.0226585	0.0190582	0.443024	0.135768	-0.0828174	-0.146787	0.223957	0.108464	0.190633	0.0467144	0.0442356	0.307241	0.0383882	0.216456	-0.132645	0.443121	0.115743	0.0836422	0.104588	-0.0550904	-0.0141739	0.158603	0.195334	0.0662433	0.0837882	0.452596	0.257725
0.0531371	1.21049	0.301893	0.520754	0.00861959	0.0382723	-0.139388	0.281719	0.0677067	0.387784	-0.203559	0.708547	0.313151	0.240384	1.00953	0.126394	-0.368985	0.830356	0.644349	0.206581	0.48095	0.101319	0.144356	-0.0705547	0.166167	0.0355821	0.192821	0.00871222	0.518984	0.0543041	0.681764	0.001964	-0.046374	-0.0107036	0.0131076	-0.0037392	0.493493	-0.036051	0.124662	-0.187918	0.0727171	0.0640288	0.253143	0.206581	0.309007	0.048225	0.117925	-0.0375404	-0.0702869	0.197377
0.0579615	-0.147711	-0.0811533	-0.206917	0.108592	-0.0809009	0.0764901	0.0821792	0.248573	0.328813	-0.243165	-0.0275974	0.501541	0.428715	0.512134	0.0999817	0.212537	-0.068128	0.0616961	0.54911	0.154102	0.00137258	0.217437	0.094954	-0.0128142	-0.209796	-0.0177455	-0.154536	0.273538	-0.233193	-0.255561	0.0051815	0.0127892	0.0833062	-0.214886	0.177241	0.390152	0.0369756	0.209371	0.417925	-0.160882	0.433273	0.00665301	0.150871	0.154252	0.147895	0.129444	0.0290121	0.287873	0.274942
0.0630729	-0.23597	0.179924	0.437251	0.0592801	0.133221	0.541251	-0.0600984	-0.0684328	0.705385	0.424938	0.131976	-0.0401925	0.452781	0.0672355	0.0501951	0.0376992	0.872491	0.685116	0.473948	-0.131533	0.660495	-0.439344	-0.263735	0.136715	0.707374	0.120677	0.282934	-0.247013	-0.00427097	0.638953	-0.0186333	0.230995	-0.248277	-0.038484	-0.179821	0.0765765	0.375307	0.171162	0.00170289	-0.173428	0.0148929	-0.313998	-0.0508914	-0.059752	-0.0401675	0.108075	0.0649074	0.108634	0.193569
[truncated: 77 more columns]

## Sheet: Figure 6 Bi, C, Ci, Cii
Ca2+ imaging data
Voltages are not corrected for liquid junction potential of 17 mV
		Parameters for Fractional activation curves							Parameters for Fractional activation curves
		Fractional activation = m0+m1/[1+exp(-(V-V half)/k)]							Fractional activation = m0+m1/[1+exp(-(V-V half)/k)]
WT							KO
Cells	dF/F0 max	m0	m1	V half (V)	k (V)		Cells	dF/F0 max	m0	m1	V half (V)	k (V)
CaInfo_Cor_140_c1	0.787166	nan	nan	nan	nan		CaInfo_Cor_83_c1	2.04911	-0.00280086	1.00221	-0.014165	0.00912565
	0.700723	-2.72596e-05	1.00003	-0.0175731	0.00461389			3.30011	-0.000467235	1.0008	-0.00112804	0.00845905
	1.87308	-0.000217644	1.00039	0.00303006	0.0081501			1.9528	-0.00015528	1.00021	-0.00403267	0.00706472
	1.12827	-0.000229133	1.00028	-0.00815137	0.00692889			0.581467	-7.75294e-09	1	-0.00877218	0.00288331
	0.280321	nan	nan	nan	nan		CaInfo_Cor_83_c2	2.00461	-4.05909e-05	1.00006	0.00560252	0.0070513
CaInfo_Cor_140_c2	1.5772	-9.95444e-07	1	-0.0188793	0.00340423			2.16069	-0.000423786	1.00076	0.00603892	0.0092816
	1.04928	-4.45761e-07	1	-0.011674	0.00371504			3.50742	-0.000104333	1.00016	0.00488743	0.0077111
	1.73016	-4.79432e-09	1	-0.016075	0.00233346			1.90674	-8.75426e-06	1.00001	0.000738012	0.00573643
	1.68315	-5.44329e-05	1.00006	-0.0135727	0.00534998			2.99911	-0.000480604	1.00088	0.00614453	0.00943777
CaInfo_Cor_140_c4	1.04619	-0.0241847	1.12209	0.00276633	0.0151248		CaInfo_Cor_90_c2	0.934109	-0.000754269	1.00262	0.0113972	0.0105853
	1.24871	-0.000321345	1.00051	-0.0168388	0.00609624			0.948332	-0.000109186	1.00013	-0.00523274	0.00665361
	1.16899	-0.000154867	1.00023	-0.0110943	0.00623347			3.05062	-9.83272e-05	1.00013	-0.0041266	0.00669479
	1.45444	-0.000847004	1.00122	-0.0162871	0.00704813		CaInfo_Cor_91_c1	0.865891	-1.45024e-08	1	0.00278714	0.00366909
CaInfo_Cor_196_c1	6.10257	-7.07888e-06	1.00001	-0.00389801	0.0052113			0.321434	nan	nan	nan	nan
	1.12435	-9.00942e-10	1	-0.0211546	0.00195711			0.586731	nan	nan	nan	nan
	1.6937	-1.33159e-05	1.00002	-0.0223742	0.00391904			1.0414	-6.58039e-07	1	0.00283947	0.00480019
	4.57335	-7.93204e-06	1.00001	-0.00493032	0.00517684			1.76664	-0.000363487	1.00065	0.000887271	0.00841681
	2.25454	-2.34473e-06	1	-0.0130432	0.00408823		CaInfo_Cor_138_c2	2.32234	-8.03179e-05	1.00009	-0.0109102	0.00585207
	3.70792	-1.70625e-05	1.00002	-0.00711857	0.00533722			1.91913	-3.63759e-05	1.00004	-0.0088012	0.00562805
	2.52671	-6.71484e-05	1.0001	-0.00421351	0.00642849			0.869548	-3.99815e-06	1.00001	-0.00065256	0.0052445
	2.71778	-0.000455749	1.00056	-0.0194261	0.00612218			0.807237	nan	nan	nan	nan
	1.44043	-0.000557514	1.00073	-0.0164962	0.00667246			1.22519	-0.000160667	1.00018	-0.0115731	0.00626575
CaInfo_Cor_196_c2	1.88222	-0.00022119	1.00057	-0.0181547	0.00559172		CaInfo_Cor_138_c3	2.51056	-0.000598697	1.00066	-0.0120003	0.00734896
	1.27099	-0.000817302	1.00053	-0.019928	0.00661059			1.91784	-0.000157092	1.00016	-0.0136445	0.00601089
	1.47737	-0.000731224	1.00398	-0.0240587	0.00527466			1.31709	-0.000468277	1.00069	-0.00446585	0.00803376
	0.882865	-9.50738e-05	1.00004	-0.00965347	0.00613616			2.10082	-3.03201e-06	1	-0.00850984	0.00451781
	2.00627	-0.000164419	1.00023	-0.00948048	0.00647045			1.47799	-0.00014715	1.00018	-0.00901452	0.0064705
	3.53649	-3.62526e-05	1.00005	-0.0104724	0.00541731			0.650504	nan	nan	nan	nan
	3.67439	-6.78985e-05	1.00009	-0.0100747	0.00581352		CaInfo_Cor_148_c1	3.10721	-7.38509e-05	1.00008	-0.0100913	0.0058741
	4.59405	-1.05649e-06	1	-0.00934998	0.00410563			1.8216	-5.0777e-09	1	-0.00320345	0.00283513
CaInfo_Cor_203_c1	0.87164	-0.000569431	1.00095	-0.0197533	0.00627689			2.83459	-0.000304109	1.0004	-0.00651534	0.00735129
	0.74622	-6.74192e-06	1.00001	-0.0184009	0.00399338			1.69737	-2.58034e-05	1.00003	-0.00214504	0.00601774
	0.949225	-0.000933942	1.00143	-0.0118999	0.00778646			2.63517	nan	nan	nan	nan
	1.12343	-0.0021585	1.00253	-0.0233384	0.00704149			1.22583	-0.000117352	1.00012	-0.0176779	0.00535357
	0.867729	-0.000459104	1.00058	-0.0190962	0.00619534		CaInfo_Cor_148_c2	4.77863	-6.87548e-05	1.00008	-0.00768747	0.00607076
CaInfo_Cor_203_c2	1.15244	nan	nan	nan	nan			5.75274	-6.59652e-05	1.00007	-0.0133391	0.00546759
	0.722794	-3.64225e-05	1.00005	-0.00893917	0.00559896			1.73697	nan	nan	nan	nan
	1.02619	-2.43747e-05	1.00003	-0.0128611	0.00502183			0.961771	nan	nan	nan	nan
	0.663215	nan	nan	nan	nan			1.36261	-4.14667e-07	1	-0.00798054	0.00392016
	0.713552	nan	nan	nan	nan		CaInfo_Cor_195_c2	1.77567	-0.00052079	1.00066	-0.0194735	0.00622158
	0.552894	nan	nan	nan	nan			5.2215	-1.78789e-05	1.00003	-0.00447033	0.00561373
	0.626277	-0.00024508	1.00038	-0.00889394	0.0068708			3.60092	-9.70291e-07	1	-0.00398698	0.00447136
	0.666649	nan	nan	nan	nan			1.46382	-0.000365391	1.00046	-0.0183725	0.00603812
CaInfo_Cor_203_c3	2.26144	-1.946e-05	1.00002	-0.0109248	0.00507813			2.12182	-6.35744e-05	1.00008	-0.0142128	0.00537809
	1.22129	-6.86194e-05	1.00007	-0.015118	0.00532152			0.704007	-0.000199397	1.00031	-0.0100538	0.00656084
	0.951204	-5.27929e-05	1.00007	-0.00538238	0.00614689			2.52912	-0.000486464	1.0009	-0.0105127	0.00721708
	1.13672	-6.54296e-07	1	-0.0117508	0.00382937			1.50605	nan	nan	nan	nan
	0.467937	-0.00152958	1.0021	-0.0107521	0.00864131		CaInfo_Cor_208_c1	1.27642	-0.00047329	1.00054	-0.0136595	0.00687736
	1.44009	-0.000440097	1.00049	-0.0208332	0.00592778			2.08909	-2.91199e-05	1.00003	-0.0149126	0.00490451
	0.888006	nan	nan	nan	nan			0.944387	-0.00143975	1.00183	-0.0161583	0.00770162
								0.558463	nan	nan	nan	nan
								1.61813	-0.000642888	1.0007	-0.0220554	0.00604775
								1.79928	-6.00854e-05	1.00006	-0.0150806	0.00524827
								1.2734	-4.19526e-05	1.00005	-0.0129178	0.00527157
								0.998325	-0.000106072	1.00011	-0.0151092	0.0055855
							CaInfo_Cor_208_c2	1.88713	-0.000360064	1.0005	-0.00590524	0.00758466
								1.4846	-6.86881e-05	1.00008	-0.0124506	0.00559906
								0.971884	-0.00148753	1.00208	-0.00895581	0.00885549
								0.691791	-0.000460877	1.00053	-0.0142808	0.00678064
								0.548547	nan	nan	nan	nan
								1.52637	-4.90197e-06	1.00001	-0.0147376	0.00420747
								0.901602	-3.44881e-07	1	-0.0156893	0.00338458
								1.19347	-0.00109138	1.0013	-0.014837	0.0075953
								1.1332	-0.000944115	1.00101	-0.0214021	0.00648685
								0.620366	1.77182e-10	1	-0.0105695	0.00191379
								1.19337	-0.000277243	1.00033	-0.0126843	0.00654007
								0.927239	-0.000179599	1.0002	-0.0149544	0.00596799
								0.480878	-0.000417773	1.00056	-0.00626677	0.00772033
								0.755348	-0.000949239	1.00119	-0.0151091	0.00740078
