# Supplementary material for: Probing the role of synaptic adhesion molecule RTN4RL2 in setting up cochlear connectivity
Source: eLife. 2025 Oct 20;14:RP103481. doi: 10.7554/eLife.103481 (PMC12537009; doi:10.7554/eLife.103481)
Supplement: Figure 7—source data 1. [file elife-103481-fig7-data1.xlsx]

## Sheet: Figure 7
ABR thesholds (dB SPL)
Mice_ID	Gender	Genotype	Average4	Average8	Average16	Average32	Average click
CBAN-00123	female	WT+/+	46.6667	40	36.6667	38.3333	53.3333
CBAN-00155	female	WT+/+	46.6667	20	18.3333	40	46.6667
CBAN-00163	female	WT+/+	45	31.6667	28.3333	31.6667	40
CBAN-00165	male	WT+/+	46.6667	40	31.6667	33.3333	50
CBAN-00167	male	WT+/+	55	23.3333	20	31.6667	45
CBAN-00169	male	WT+/+	53.3333	40	31.6667	28.3333	50
CBAN-00124	female	hetero +/-	55	46.6667	41.6667	61.6667	51.6667
CBAN-00127	male	hetero +/-	75	41.6667	40	78.3333	85
CBAN-00129	male	hetero +/-	53.3333	33.3333	38.3333	75	51.6667
CBAN-00130	male	hetero +/-	78.3333	36.6667	41.6667	41.6667	48.3333
CBAN-00131	female	hetero +/-	71.6667	46.6667	38.3333	83.3333	48.3333
CBAN-00142	male	hetero +/-	71.6667	46.6667	46.6667	48.3333	46.6667
CBAN-00147	female	hetero +/-	66.6667	60	65	71.6667	85
CBAN-00148	female	hetero +/-	65	46.6667	45	41.6667	51.6667
CBAN-00149	female	hetero +/-	66.6667	46.6667	53.3333	70	46.6667
CBAN-00154	male	hetero +/-	65	45	51.6667	51.6667	53.3333
CBAN-00164	female	hetero +/-	55	36.6667	36.6667	50	46.6667
CBAN-00170	male	hetero +/-	78.3333	46.6667	38.3333	48.3333	51.6667
CBAN-00118	male	KO-/-	71.6667	58.3333	43.3333	60	96.6667
CBAN-00121	female	KO-/-	86.6667	83.3333	70	81.6667	100
CBAN-00126	male	KO-/-	120	108.333	78.3333	120	110
CBAN-00128	male	KO-/-	85	71.6667	75	86.6667	101.667
CBAN-00141	male	KO-/-	80	68.3333	65	80	86.6667
CBAN-00144	male	KO-/-	70	63.3333	75	120	63.3333
CBAN-00145	female	KO-/-	86.6667	60	70	70	85
CBAN-00152	female	KO-/-	73.3333	55	46.6667	75	80
CBAN-00156	female	KO-/-	78.3333	76.6667	71.6667	80	103.333
CBAN-00161	female	KO-/-	71.6667	66.6667	66.6667	86.6667	88.3333
CBAN-00171	male	KO-/-	80	73.3333	68.3333	80	85
